# Supplementary material for: Syntheses and structures of [7]helicene and double helicene based on dithieno[2,3-b:2′,3′-d]thiophene
Source: Royal Society of Chemistry journal article supplement (doi:10.1039/c7qo01049d), 2018-01-01
Supplement: c7qo01049d1.pdf [file c7qo01049d1.pdf]

Supporting Information for:

**Syntheses and Structures of [7]Helicene and Double Helicene Based on**

**Dithieno[2,3-*b*:2',3'-*d*]thiophene**

Xinming Liu,<sup>‡a,b</sup> Huiliang Sun,<sup>‡a</sup> Wan Xu,<sup>a</sup> Shisheng Wan,<sup>a</sup> Jianwu Shi,<sup>a</sup> Chunli Li,<sup>\*a</sup>

and Hua Wang<sup>\*a</sup>

a. Engineering Research Center for Nanomaterials, Henan University, Kaifeng, 475004, P. R. China

b. College of Chemistry and Chemical Engineering, Shangqiu Normal University, Shangqiu, 476000, P. R. China

**Table of Contents**

|                                                        |            |
|--------------------------------------------------------|------------|
| <b>1. General Experimental Details</b>                 | <b>S2</b>  |
| <b>2. Experimental Procedures</b>                      | <b>S3</b>  |
| <b>3. NMR and HRMS Spectra</b>                         | <b>S12</b> |
| <b>4. X-ray crystallographic data</b>                  | <b>S33</b> |
| <b>5. Photophysical and electrochemical properties</b> | <b>S36</b> |

## 1. General Experimental Details

Ether and tetrahydrofuran (THF) for use on vacuum line were freshly distilled from sodium/benzophenone prior to use. Compound **14** was prepared according to our previous research work.<sup>S1</sup> *t*-BuLi (pentane) and *n*-BuLi (hexane) were obtained from Energy Chemical, prior to use, their concentrations were determined by titration with *N*-pivaloyl-*o*-toluidine.<sup>S2</sup> Column chromatography was carried out on silica gel (200-300 or 300-400 mesh). Analytical thin-layer chromatography was performed on glass plates of Silica Gel GF-254 with detection by UV. Standard techniques for synthesis under inert atmosphere, using gasbag and Schlenk glassware equipped with an 8-mm PTFE vacuum stop-cock were employed. All starting materials and reagents were commercially available.

<sup>1</sup>H NMR and <sup>13</sup>C NMR spectra were recorded on 300 or 400 MHz NMR instrument using CDCl<sub>3</sub> and benzene-*d*<sub>6</sub> as solvents. IR spectra were obtained using an FT-IR instrument. HRMS analysis was carried out on a mass spectrometer, operation mode is EI or MALD/DHB. Melting point determination was taken on a Melt-Temp apparatus and was uncorrected. The X-ray crystallographic analyses were performed using crystals of compounds **11**, **14**, *rac*-**1** and **4** with the size 0.46 x 0.23 x 0.19, 0.19 x 0.15 x 0.13, 0.39 x 0.32 x 0.27, 0.43 x 0.26 x 0.17 mm<sup>3</sup>, respectively. The intensity data were collected with the  $\omega$  scan mode (296 K) on diffractometer with CCD detector using Mo K $\alpha$  radiation ( $\lambda = 0.71073$  Å). The data were corrected for Lorentz and polarisation effects and absorption corrections were performed using SADABS program.<sup>S3</sup> The crystal structures were solved using the SHELXTL program and refined using full matrix least squares.<sup>S4</sup> The positions of hydrogen atoms were calculated theoretically and included in the final cycles of refinement in a riding model along with attached carbons. Further details are in the deposited CIFs. Slow evaporation of solutions of **11**, **14**, *rac*-**1** and **4** in CHCl<sub>3</sub>-CH<sub>3</sub>OH was employed for growing single crystals.

## Reference

1. H. Sun, J. Shi, Z. Zhang, S. Zhang, Z. Liang, S. Wan, Y. Cheng, H. Wang, *J. Org. Chem.* 2013, **78**, 6271.
2. J. Suffert, *J. Org. Chem.* 1989, **54**, 509.
3. Sheldrick, G. M. *SADABS*. University of Gottingen, Germany, 1996.
4. Sheldrick, G. M. *SHELXTL*, version 5.1; Bruker Analytical X-ray Systems, Inc.: Madison, WI, 1997.

## 2. Experimental Procedures

### Synthesis of 2,3-dibromo-5-trimethylsilylthiophene (**8**)

Me<sub>3</sub>SiCl (0.4 mL, 3.1517 mmol, 1.2 equiv) was added dropwise to the LDA (1.05 equiv) solution in Et<sub>2</sub>O (30 mL) at -78 °C, after 15 min at -78 °C, 2,3-dibromothiophene (0.6411 g, 2.6499 mmol, 1.0 equiv) was added dropwise to mixture of LDA and Me<sub>3</sub>SiCl. After keeping at -78 °C for 15 min, the reaction mixture was warmed slowly to ambient temperature overnight. The reaction mixture was quenched with H<sub>2</sub>O (30 mL), extracted with Et<sub>2</sub>O (2 × 40 mL), and then washed with H<sub>2</sub>O (2 × 40 mL). After drying over MgSO<sub>4</sub>, the solvent was removed in vacuum. The residue was purified by column chromatography on silica gel with petrol ether (60-90 °C) as eluent to yield **8** (0.8121 g, 97%) as a colorless liquid. From the other reaction on a 10.685 g scale of 2,3-dibromothiophene, 13.3521 g (96%) of **8** was obtained. <sup>1</sup>H NMR (400 MHz, CDCl<sub>3</sub>) δ (ppm): 7.00 (s, 1H), 0.30 (s, 9H). <sup>13</sup>C NMR (100 MHz, CDCl<sub>3</sub>) δ (ppm): 143.0, 136.1, 115.4, 115.2, -0.5. HRMS (EI<sup>+</sup> 70 eV) *m/z* calcd for [C<sub>7</sub>H<sub>10</sub>Br<sub>2</sub>SSi] 311.8639, found 311.8637. IR(liquid): 2956, 2896 cm<sup>-1</sup>.

### Synthesis of 3-bromo-5-trimethylsilanyl-[2,3']bithiophene (**9**)

Compound **8** (0.5855 g, 1.8639 mmol), thiophen-3-ylboronic acid (0.2623 g, 2.0504 mmol, 1.1 equiv), Pd(PPh<sub>3</sub>)<sub>4</sub> (86.2 mg, 0.074 mmol, 0.04 equiv) and K<sub>2</sub>CO<sub>3</sub> aqueous solution (2 M, 2.3 mL, 4.6 mmol, 2.5 equiv) were added into THF(100 mL) under argon. The reaction mixture was stirred for 48 h at 80 °C. The reaction mixture was

extracted with chloroform ( $3 \times 10$  mL) and washed with H<sub>2</sub>O ( $2 \times 20$  mL). After drying over MgSO<sub>4</sub>, the solvent was removed in vacuo to obtain the crude. The crude was purified by column chromatography on silica gel with petrol ether (60-90 °C) as eluent to yield **9** (0.3352 g, 57%) as a colorless liquid. From the other reaction on a 6.7347 g scale of **8**, 4.1620 g (61%) of **9** was obtained. <sup>1</sup>H NMR (400 MHz, CDCl<sub>3</sub>)  $\delta$  (ppm): 7.75 (dd,  $J = 2.8, 1.2$  Hz, 1H), 7.45 (dd,  $J = 5.2, 1.2$  Hz, 1H), 7.37 (dd,  $J = 5.2, 2.8$  Hz, 1H), 7.12 (s, 1H), 0.33 (s, 9H). <sup>13</sup>C NMR (100 MHz, CDCl<sub>3</sub>)  $\delta$  (ppm): 139.1, 138.04, 138.00, 133.1, 127.6, 125.6, 122.9, 108.3, -0.4. HRMS (EI 70 eV)  $m/z$  calcd for [C<sub>11</sub>H<sub>13</sub>BrS<sub>2</sub>Si] 315.9411, found 315.9410. IR(liquid): 3109, 2954, 2894 cm<sup>-1</sup>.

### Synthesis of 2-trimethylsilanyl-dithieno[2,3-*b*:2',3'-*d*]thiophene (**10**)

To a solution of **9** (0.3062 g, 0.9649 mmol) in dry ethyl ether (10 mL), *n*-BuLi (2.2935 M in hexane, 0.86 mL, 2.05 equiv) was added dropwise at -78 °C. After keeping at -78 °C for 2 h, dry (PhSO<sub>2</sub>)<sub>2</sub>S (0.3021 g, 0.9614 mmol, 0.95 equiv) was added. The reaction mixture was kept at -78 °C for 2 h, then warmed up slowly to ambient temperature overnight. The reaction mixture was quenched with water, extracted with ethyl ether ( $3 \times 20$  mL). The organic layer was washed with water ( $3 \times 25$  mL) and then dried over MgSO<sub>4</sub>. The colorless liquid **10** (0.1297 g, 50%) was obtained by column chromatography on silica gel with petrol ether (60-90 °C) as eluent. From other reaction on the 2.7969 g scale of **9**, 1.1074 g (47%) of **10** was obtained. <sup>1</sup>H NMR (400 MHz, CDCl<sub>3</sub>)  $\delta$ (ppm): 7.38 (d,  $J = 5.2$  Hz, 1H), 7.35 (s, 1H), 7.31 (d,  $J = 5.2$  Hz, 1H), 0.37 (s, 9H). <sup>13</sup>C NMR (100 MHz, CDCl<sub>3</sub>)  $\delta$ (ppm): 143.3, 141.2, 139.7, 137.2, 135.8, 127.9, 126.2, 118.6, -0.1. HRMS (EI, 70 eV)  $m/z$  calcd for [C<sub>11</sub>H<sub>12</sub>S<sub>3</sub>Si] 267.9870, found 267.9874. IR (KBr): 3105, 3078, 2954, 2896 cm<sup>-1</sup>.

### Synthesis of 6-bromo-2-trimethylsilanyl-dithieno[2,3-*b*:2',3'-*d*]thiophene (**11**)

*n*-BuLi (2.3353 M in hexane, 0.6 mL, 1.4012 mmol, 1.5 equiv) was added dropwise to diisopropylamine (0.24 mL, 1.7029 mmol, 1.8 equiv) in THF (5 mL) at 0 °C. After 1 h at 0 °C, the prepared LDA solution was transferred by syringe into a solution of **10** (0.3495 g, 1.3017 mmol) in dry ethyl ether (10 mL) at -78 °C. After keeping at -78

°C for 2 h, C<sub>2</sub>Br<sub>2</sub>Cl<sub>4</sub> (0.4620 g, 1.4187 mmol, 1.1 equiv) was added. The reaction mixture was kept at -78 °C for 2 h, then warmed up slowly to ambient temperature overnight. The reaction mixture was quenched with water, extracted with ethyl ether (3 × 20 mL). The organic layer was washed with water (3 × 25 mL) and then dried over MgSO<sub>4</sub>. The white product **11** (0.4368 g, 97%) was obtained by column chromatography on silica gel with petrol ether (60-90 °C) as eluent. From other reaction on the 0.5985 g scale of **10**, 0.7588 g (98%) of **11** was obtained. Mp: 85-86 °C. <sup>1</sup>H NMR (400 MHz, CDCl<sub>3</sub>) δ(ppm): 7.332 (s, 1H), 7.330 (s, 1H), 0.37 (s, 9H). <sup>13</sup>C NMR (100 MHz, CDCl<sub>3</sub>) δ(ppm): 142.5, 142.1, 138.5, 136.5, 135.5, 126.0, 121.7, 113.0, -0.2. HRMS (EI<sup>+</sup>, 70 eV) *m/z* calcd for [C<sub>11</sub>H<sub>11</sub>BrS<sub>3</sub>Si] 345.8976, found 345.8973. IR: 3095, 2951, 2893, 2854 cm<sup>-1</sup>.

#### Synthesis of 7-bromo-2-trimethylsilanyl-dithieno[2,3-*b*:2',3'-*d*]thiophene (**12**)

*n*-BuLi (2.3353 M in hexane, 0.2 mL, 0.4671 mmol, 1.5 equiv) was added dropwise to diisopropylamine (0.08 mL, 0.5676 mmol, 1.8 equiv) in THF (5 mL) at 0 °C. After 1 h at 0 °C, the prepared LDA solution was transferred by syringe into a solution of **11** (0.1028 g, 0.2959 mmol) in THF (10 mL) at -30 °C. After 10 h at -30 °C, methanol (excess) was added to quench the reaction. The reaction mixture was extracted with CHCl<sub>3</sub> (3 × 15 mL) and washed with saturated NaCl (30 mL) and water (30 mL), and then dried over MgSO<sub>4</sub>. After the removal of the solvent under vacuum, the residue was purified by column chromatography on silica gel with petrol ether (60-90 °C) as eluent to yield colorless ropiness liquid **12** (98.3 mg, 96%). From other reaction on the 0.6374 g scales of **11**, 0.5788 g (91%) of **12** were obtained. <sup>1</sup>H NMR (400 MHz, CDCl<sub>3</sub>) δ(ppm): 7.36 (s, 1H), 7.27 (s, 1H), 0.38 (s, 9H). <sup>13</sup>C NMR (100 MHz, CDCl<sub>3</sub>) δ(ppm): 143.6, 142.8, 138.7, 137.0, 135.0, 125.8, 124.0, 102.3, -0.2. HRMS (EI, 70 eV) *m/z* calcd for [C<sub>11</sub>H<sub>11</sub>BrS<sub>3</sub>Si] 345.8976, found 345.8975. IR: 3106, 2954, 2894 cm<sup>-1</sup>.

#### Synthesis of 2,2'-di(trimethylsilanyl)-7,7'-bis-dithieno-[2,3-*b*:2',3'-*d*]thiophene (**13**)

To the solution of **12** (0.1359 g, 0.3912 mmol) in dry ethyl ether (10 mL), *t*-BuLi (1.7588 M in pentane, 0.46 mL, 0.8090 mmol, 2.1 equiv) was added dropwise at -78 °C. After keeping for 2 h at -78 °C, dry CuCl<sub>2</sub> (0.1631 mg, 1.2131 mmol, 3.0 equiv) was added. The reaction mixture then warmed up slowly to ambient temperature overnight. The reaction mixture was quenched with water, extracted with ethyl ether (3 × 20 mL). The organic layer was washed with water (3 × 25 mL) and then dried over MgSO<sub>4</sub>. The white product **13** (0.0531 g, 51%) was obtained by column chromatography on silica gel with petrol ether (60-90 °C) as eluent. From other reaction on the 0.7492 g scale of **12**, 0.3160 g (55%) of **13** was obtained. Mp: 182-184 °C. <sup>1</sup>H NMR (400 MHz, CDCl<sub>3</sub>) δ(ppm): 7.71 (s, 2H), 7.37 (s, 2H), 0.34 (s, 18H). <sup>13</sup>C NMR (100 MHz, CDCl<sub>3</sub>) (ppm): 143.8, 141.3, 140.2, 136.6, 135.4, 127.5, 126.1, 124.8, -0.1. HRMS (Tesla FTMS) *m/z* calcd for [C<sub>22</sub>H<sub>22</sub>S<sub>6</sub>Si<sub>2</sub>] 533.9584, found 533.9563. IR (KBr): 3098, 2951, 2890 cm<sup>-1</sup>.

#### Synthesis of [7]helicene (*rac*-**1**)

*n*-BuLi (2.2637 M in hexane, 0.26 mL, 0.5885 mmol, 2.2 equiv) was added dropwise to diisopropylamine (0.1 mL, 0.7095 mmol, 2.7 equiv) in Et<sub>2</sub>O (15 mL) at 0 °C. After 1.5 h at 0 °C, the prepared LDA solution was transferred by syringe into a solution of **13** (19.8 mg, 0.0198 mmol) in Et<sub>2</sub>O (20 mL) at 0 °C. After 2 h at 0 °C, dry (PhSO<sub>2</sub>)<sub>2</sub>S (12.6 mg, 0.0401 mmol, 1.0 equiv) was added at 0 °C, then the reaction mixture was kept at 0 °C for 2 h and then warmed up slowly to ambient temperature overnight. The reaction mixture was quenched with water, extracted with ethyl ether (3 × 20 mL) and then washed with water (2 × 30 mL). After drying over MgSO<sub>4</sub>, the solvent was removed under vacuum. The residue was purified by column chromatography on silica gel with petrol ether (60-90 °C) as eluent to yield *rac*-**1** (0.0167 g, 80%) as a white solid. From other reaction on the 0.0442 g scales of **13**, 0.0337 g (72%) of *rac*-**1** were obtained, respectively. Mp: 265-268 °C. <sup>1</sup>H NMR (400 MHz, CDCl<sub>3</sub>) δ(ppm): 7.40 (s, 2H), 0.36 (s, 18H). <sup>13</sup>C NMR (100 MHz, CDCl<sub>3</sub>) δ(ppm): 143.2, 141.6, 140.7, 140.2, 135.9, 130.3, 129.1, 125.5, -0.0. HRMS (Tesla FTMS) *m/z* calcd for [C<sub>22</sub>H<sub>20</sub>S<sub>7</sub>Si<sub>2</sub>] 563.9148, found 563.9131. IR (KBr): 3069, 2952 cm<sup>-1</sup>.

### Synthesis of D<sub>2</sub>-Symmetric Dimer (*rac*-2)

LDA (0.83 mmol, 4.05 equiv) solution in Et<sub>2</sub>O (5 mL) was added dropwise into the solution of **13** (0.1101 g, 0.21 mmol) in Et<sub>2</sub>O (10 mL) at -78 °C. Reaction mixture was warmed up slowly to 0 °C for and kept for 2 h, then dry CuCl<sub>2</sub> (0.1407 g, 1.05 mmol, 5.0 equiv) was added at -78 °C. The reaction mixture was warmed up slowly to ambient temperature and kept for 13 h. The reaction mixture was warmed up slowly to 60 °C kept for 6 h. The reaction mixture was quenched with water, extracted with CH<sub>2</sub>Cl<sub>2</sub> (3 × 10 mL). The organic layer was washed with water (2 × 20 mL), and then dried over MgSO<sub>4</sub>, the solvent was removed under vacuum. The residue was purified by column chromatography on silica gel with petrol ether (60-90 °C) as eluent to yield *rac*-**2** (0.0471 g, 43%) as a yellow solid, Mp: >300 °C. <sup>1</sup>H NMR (CDCl<sub>3</sub>, 400 MHz): δ(ppm): 7.20 (s, 4 H), 0.13 (s, 36 H), <sup>13</sup>C NMR (CDCl<sub>3</sub>, 100 MHz): δ(ppm): 142.8, 142.6, 140.9, 137.3, 136.8, 135.0, 127.4, 124.6, -0.13. HRMS (TOF MS EI<sup>+</sup>) m/z calcd for [C<sub>44</sub>H<sub>40</sub>Si<sub>4</sub>S<sub>12</sub>] 1063.8856. found 1063.8882. IR (KBr): 3070, 2954, 1373 cm<sup>-1</sup>.

### Synthesis of 6-trimethylsilylanyl-dithieno[2,3-*b*:2',3'-*d*]thiophene-2-carbaldehyde (**15**)

*n*-BuLi (2.39 M in hexane, 0.24 mL, 0.55 mmol, 1.0 equiv) was added dropwise to **14** (0.19 g, 0.55 mmol) in THF (15 mL) at -78 °C. After 1.5 h at -78 °C, DMF (0.08 mL, 1.03 mmol, 2.0 equiv) was added at -78 °C, then the reaction mixture warmed up slowly to ambient temperature overnight. The reaction mixture was quenched with water, extracted with CHCl<sub>3</sub> (3 × 10 mL). The organic layer was washed with saturated NaCl (20 mL) and water (2 × 20 mL), and then dried over MgSO<sub>4</sub>. The residue was purified by column chromatography on silica gel with petrol ether (60-90 °C) as eluent to yield **15** (0.14 g, 86%) as a yellow solid. From other reaction on the 0.40 g of **14**, (0.30 g, 90%) of **15** was obtained. Mp: 106-107 °C. <sup>1</sup>H NMR (400 MHz, CDCl<sub>3</sub>) δ 9.97 (s, H), 7.93 (s, 1H), 7.47 (s, 1H), 0.39 (s, 9H). <sup>13</sup>C NMR (100 MHz, CDCl<sub>3</sub>) δ 183.1, 149.3, 147.1, 143.2, 141.9, 139.4, 137.4, 130.0, 125.0, -0.2. HRMS

(EI<sup>+</sup>, 70 eV) m/z calcd for [C<sub>12</sub>H<sub>12</sub>OS<sub>3</sub>Si] 295.9820, found 295.9822. IR (KBr): 2800, 2948 cm<sup>-1</sup>, 1664 cm<sup>-1</sup>.

### Synthesis of 1,2-bis(6-(trimethylsilyl)dithieno[2,3-*b*:2',3'-*d*]thiophen-2-yl)ethene (16)

TiCl<sub>4</sub> (0.18 mL, 1.65 mmol, 5.0 equiv) was carefully added into dry THF (10 mL) at 0 °C. After keeping at 0 °C for 30 min, zinc dust (0.21 g, 3.30 mmol, 10.0 equiv) was added, and then the mixture was refluxed at 85 °C for 2 h. After that, pyridine (0.14 mL, 1.65 mmol, 5.0 equiv) was added and the mixture was refluxed for another 1 h. After cooling to ambient temperature, a solution of **15** (0.10 g, 1 mmol) in dry THF (5 mL) was added and the reaction mixture was refluxed at 90 °C for 18 h. The reaction was quenched with water at 0 °C, then extracted with CHCl<sub>3</sub> (3 × 15 mL) and washed with saturated NH<sub>4</sub>Cl (10 mL) and H<sub>2</sub>O (3 × 10 mL), and then dried over MgSO<sub>4</sub>. After removing the solvent in vacuum, the residue was purified by column chromatography on silica gel with petrol ether (60-90 °C) as eluent to yield **16** (0.08 g, 85%) as a yellow solid. From other reaction on the 0.25 g of **15**, 0.212 g (90%) of **16** was obtained. Mp: 245-247 °C. <sup>1</sup>H NMR (400 MHz, CDCl<sub>3</sub>) δ 7.38 (s, 2H), 7.20 (s, 2H), 7.08 (s, 2H), 0.39 (s, 18H). <sup>13</sup>C NMR (100 MHz, CDCl<sub>3</sub>) δ 145.6, 144.4, 142.4, 142.1, 139.9, 128.8, 124.5, 121.5, 119.4, -0.1. HRMS (MALDI) m/z calcd for [C<sub>24</sub>H<sub>24</sub>Si<sub>2</sub>S<sub>6</sub>] 559.9741, found 559.9753. IR (KBr): 2952, 3018, 3067 cm<sup>-1</sup>.

### Synthesis of bull's horn-shaped benzo-hexathienoacene (4)

To a solution of **16** (0.023 g, 0.04 mmol) in dry toluene (40 mL), iodine (5.3 mg, 0.02 mmol, 0.5 equiv) was added. The reaction solution was irradiated with a 450 W unfiltered Hg medium pressure lamp for 40 minutes. The reaction was quenched with saturated Na<sub>2</sub>S<sub>3</sub>O<sub>3</sub> (5 mL). The reaction mixture was extracted with CHCl<sub>3</sub> (3 × 10 mL) and washed with H<sub>2</sub>O (3 × 10 mL), and then dried over MgSO<sub>4</sub>. After removing the solvent in vacuum, the crude product was purified by column chromatography on silica gel with petrol ether (60-90 °C) /CHCl<sub>3</sub> (4:1, v/v) as eluent to yield **4** (0.017 mg, 72%) as a yellow solid. From other reaction on the 0.032 g of **16**, 0.023 g (70%) of **4**



was obtained. Mp: >300 °C. <sup>1</sup>H NMR (400 MHz, CDCl<sub>3</sub>) δ 7.84 (s, 2H), 7.50 (s, 2H), 0.42 (s, 18H). <sup>13</sup>C NMR (100 MHz, CDCl<sub>3</sub>) δ 146.0, 144.8, 139.9, 138.7, 135.6, 129.4, 126.7, 124.7, 119.7, -0.1. HRMS (MDALI) m/z calcd for [C<sub>24</sub>H<sub>22</sub> Si<sub>2</sub>S<sub>6</sub><sup>+</sup>] 557.9584, found 557.9595. IR (KBr): 2953, 2894, 1631, 1555, 1531 cm<sup>-1</sup>.

### Synthesis of 2-bromo-dithieno[2,3-*b*:2',3'-*d*]thiophene (**17**)

**14** (0.30 g, 0.86 mmol) was dissolved in 15 mL CHCl<sub>3</sub>, TFA (0.12 mL, 1.72 mmol, 2.0 equiv) was added dropwise. The mixture was stirred at room temperature for 2 h, then the reaction mixture was quenched with 10 mL water and extracted with chloroform (3 × 10 mL), then washed with saturated NaHCO<sub>3</sub> (10 mL) and water (10 mL). The organic layer was dried over anhydrous MgSO<sub>4</sub>. After the solvent was removed under vacuum, the residue was purified by column chromatography on silica gel with PE (60-90 °C) as eluent to yield **17** (0.22 g, 95%) as a white solid. From other reactions on the 0.45 g scale of **14**, 0.35 g (97%) of **17** were obtained, respectively. Mp: 84-86 °C. <sup>1</sup>H NMR (400 MHz, benzene-*d*<sub>6</sub>) δ 6.66 (d, *J* = 5.2 Hz, 1H), 6.60 (d, *J* = 5.2 Hz, 1H), 6.54 (s, 1H). <sup>13</sup>C NMR (100 MHz, CDCl<sub>3</sub>) δ 139.7, 138.5, 137.5, 131.1, 128.5, 122.9, 118.1, 111.7. HRMS (EI<sup>+</sup>, 70 eV): m/z calcd for [C<sub>8</sub>H<sub>3</sub>S<sub>3</sub>Br] 273.8580, found 273.8578. IR (KBr): 2895, 2953, 3060 cm<sup>-1</sup>.

### Synthesis of 2-[(5-trimethylsilyl)-2-thienyl]-dithieno[2,3-*b*:2',3'-*d*]thiophen (**18**)

Compound **17** (0.36 g, 1.31 mmol), trimethyl(5-(4,4,5,5-tetramethyl-1,3,2-dioxaborolan-2-yl)thio-phen-2-yl)silane (0.4 g, 1.41 mmol 1.05 equiv), K<sub>2</sub>CO<sub>3</sub> (0.45 g, 3.28 mmol, 2.5 equiv) and Pd(PPh<sub>3</sub>)<sub>4</sub> (90.80 mg, 78.61 μmol, 0.06 equiv) were added into a Schlenk vessel under argon, then THF (20 mL) and water (0.85 mL) were added into the mixture. The reaction mixture was stirred for 23 h at 80 °C. The reaction mixture was extracted with chloroform (3 × 30 mL), and finally dried over anhydrous MgSO<sub>4</sub>. After the solvent was removed in vacuum, the residue was purified by column chromatography on silica gel with petroleum ether (60-90 °C) as eluent to yield **18** (0.37 g, 81%) as a white solid. From other two reactions on the 0.44 g and 0.42 g scales of **17**, 0.46 g (84%) and 0.43 g (82%) of **18** were obtained,

respectively. Mp: 98-99 °C. <sup>1</sup>H NMR (400 MHz, CDCl<sub>3</sub>) δ 7.41 (d, *J* = 8.0 Hz 1H), 7.36 (s, 1H), 7.29 (d, *J* = 8.0 Hz 1H), 7.27 (d, *J* = 4.0 Hz 1H), 7.17 (d, *J* = 4.0 Hz 1H), 0.35 (s, 9H). <sup>13</sup>C NMR (100 MHz, CDCl<sub>3</sub>) δ 142.5, 141.6, 140.2, 138.7, 137.7, 137.4, 134.8, 129.5, 128.3, 125.0, 118.3, 116.7, -0.1. HRMS (MADLI/DBH) *m/z* calcd for [C<sub>15</sub>H<sub>14</sub>S<sub>4</sub>Si] 349.9748, found 349.9729. IR (KBr): 2895, 2953, 3060 cm<sup>-1</sup>.

### Synthesis of 2-(5-(trimethylsilyl)thiophen-2-yl)dithieno[2,3-*b*:2',3'-*d*]thiophene-6-carbaldehyde (**19**)

*n*-BuLi (2.36 M in hexane, 0.10 mL, 0.25 mmol, 1.2 equiv) was added dropwise to **18** (0.12 g, 0.21 mmol) in THF (12 mL) at -78 °C. After 2 h at -78 °C, DMF (0.04 mL, 0.42 mmol, 2.0 equiv) was added at -78 °C, then the reaction mixture warmed up slowly to ambient temperature over night. The reaction mixture was quenched with water, extracted with CHCl<sub>3</sub> (3 × 10 mL). The organic layer was washed with saturated NaCl (20 mL) and water (2 × 20 mL), and then dried over MgSO<sub>4</sub>. The residue was purified by column chromatography on silica gel with petrol ether (60-90 °C) as eluent to yield **19** (0.12 g, 90%) as a yellow solid. From other reaction on the 0.265 g of **18**, 0.25 g 88%) of **19** was obtained. Mp: 181-182 °C. <sup>1</sup>H NMR (400 MHz, CDCl<sub>3</sub>) δ 9.94 (s, 1H), 7.94 (s, 1H), 7.37 (s, 1H), 7.30 (d, *J* = 4.0 Hz 1H), 7.18 (d, *J* = 4.0 Hz 1H), 0.35 (s, 9H). <sup>13</sup>C NMR (100 MHz, CDCl<sub>3</sub>) δ 182.5, 148.1, 146.5, 142.2, 141.7, 141.1, 139.3, 137.6, 134.8, 129.3, 127.0, 125.5, 116.4, -0.1. HRMS (EI<sup>+</sup>, 70 ev) *m/z* calcd for [C<sub>15</sub>H<sub>14</sub>S<sub>4</sub>Si] 349.9667, found 349.9701. IR (KBr): 2815, 2959, 3052, 1676 cm<sup>-1</sup>.

### Synthesis of 1,2-bis(2-(5-(trimethylsilyl)thiophen-2-yl)dithieno[2,3-*b*:2',3'-*d*]thiophen-6-yl)ethene (**20**)

TiCl<sub>4</sub> (0.14 mL, 1.25 mmol, 5.0 equiv) was added into dry THF (10 mL) at 0 °C. After keeping at 0 °C for 30 min, zinc dust (0.16 g, 2.50 mmol, 10.0 equiv) was added, and then the mixture was refluxed for 2 h at 85 °C. After that, pyridine (0.10 mL, 1.25 mmol, 5.0 equiv) was added and the mixture was refluxed for another 1 h. After cooling to ambient temperature, a solution of **19** (0.093 g, 0.25 mmol) in dry

THF (5 mL) was added and the reaction mixture was refluxed for 18 h at 90 °C. The reaction was quenched with water at 0 °C, then extracted with CHCl<sub>3</sub> (3 × 10 mL) and washed with saturated NH<sub>4</sub>Cl (20 mL) and H<sub>2</sub>O (3 × 10 mL), and then dried over MgSO<sub>4</sub>. After removing the solvent in vacuum, orange powder centrifugal was washed from hexane, **20** was obtained (0.078 g, 86%). From other reaction on the 0.22 g of **19**, 0.187 g (82%) of **20** was obtained. Mp: >300 °C. NMR spectra were not recorded due to its poor solubility. MS (EI, 70 eV): m/z = 724.2 (25) [M<sup>+</sup>]. HRMS (MADLI) m/z calcd for [C<sub>32</sub>H<sub>28</sub>Si<sub>2</sub>S<sub>8</sub>] 723.9495, found 723.9497. IR (KBr): 3054, 2952, 1619, 986 cm<sup>-1</sup>.

### Synthesis of benzohehexathia[7]helicene derivative *rac*-**3**

To a solution of **20** (0.044 g, 0.06 mmol) in dry toluene (60 mL), iodine (7.7 mg, 0.03 mmol, 0.5 equiv) was added. The reaction solution was irradiated with a 450 W unfiltered Hg medium pressure lamp for 40 minutes. The reaction was quenched with saturated Na<sub>2</sub>S<sub>3</sub>O<sub>3</sub> (5 mL). The reaction mixture was extracted with CHCl<sub>3</sub> (3 × 15 mL) and washed with H<sub>2</sub>O (3 × 20 mL), and then dried over MgSO<sub>4</sub>. After removing the solvent in vacuum, the crude product was purified by column chromatography on silica gel with petrol ether (60-90 °C) /CHCl<sub>3</sub> (4:1, v/v) as eluent to yield *rac*-**3** (0.02 g, 44%) as a yellow solid. From other reaction on the 0.073 g of **20**, 0.031 g (43%) of *rac*-**3** was obtained. Mp: 237-238 °C. <sup>1</sup>H NMR (400 MHz, CDCl<sub>3</sub>) δ 7.72 (s, 2H), 7.34 (s, 2H), 7.05 (d, *J* = 3.6 Hz 2H), 7.04 (d, *J* = 3.6 Hz 2H), 0.29 (s, 18H). <sup>13</sup>C NMR (100 MHz, CDCl<sub>3</sub>) δ 142.5, 142.3, 141.8, 141.2, 140.1, 137.8, 134.7, 132.2, 131.9, 125.6, 125.3, 118.7, 116.0, -0.2. HRMS (MALDI/DBH) m/z calcd for [C<sub>32</sub>H<sub>26</sub>Si<sub>2</sub>S<sub>8</sub>] 721.9339, found 721.9346. IR (KBr): 3055, 2953, 1532, 1482, 1430, 840 cm<sup>-1</sup>.

### 3. NMR and HRMS Spectra

#### NMR and HRMS Spectra of **8**

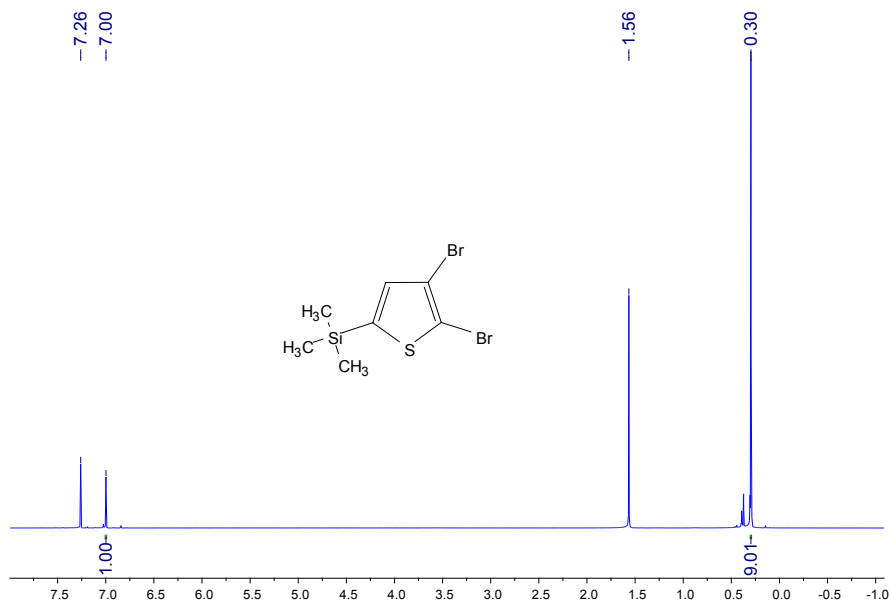

Figure S1. <sup>1</sup>H NMR (400 MHz, CDCl<sub>3</sub>) spectrum of **8**

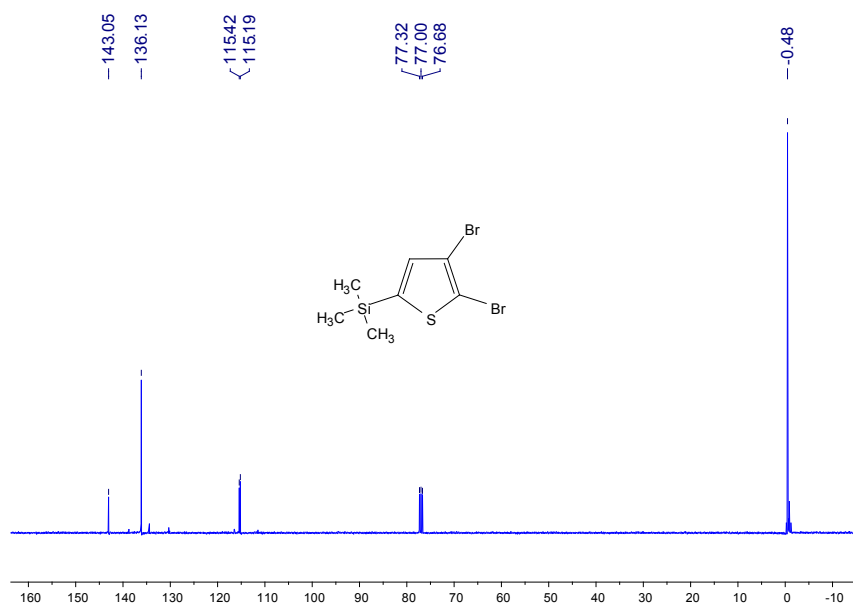

Figure S2. <sup>13</sup>C NMR (100 MHz, CDCl<sub>3</sub>) spectrum of **8**



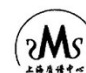

Shanghai Mass Spectrometry Center  
Shanghai Institute of Organic Chemistry  
Chinese Academy of Sciences  
High Resolution MS Data Report

Instrument: Waters Micromass GCT Premier Ionisation Mode: EI+ Electron Energy: 70eV

Card Serial Number: GCT-P-TI3-05-050332

Sample Serial Number: LXM-3-157col

Operator: Li

Date: 2013/05/08

#### Elemental Composition Report

Single Mass Analysis  
Tolerance = 5.0 PPM / DBE: min = -1.5, max = 50.0  
Element prediction: Off

Monoisotopic Mass, Odd and Even Electron Ions  
447 formula(e) evaluated with 5 results within limits (all results (up to 1000) for each mass)  
Elements Used:  
C: 0-60 H: 0-80 O: 0-2 Si: 0-3 S: 0-3 Br: 0-1 I: 0-1

|          |            |      |      |      |        |                    |
|----------|------------|------|------|------|--------|--------------------|
| Minimum: |            | 2.0  | 5.0  | -1.5 |        |                    |
| Maximum: |            |      |      | 50.0 |        |                    |
| Mass     | Calc. Mass | mDa  | PPM  | DBE  | i-FIT  | Formula            |
| 315.9410 | 315.9411   | -0.1 | -0.3 | 6.0  | 3.5    | C11 H13 Si S2 Br   |
|          | 315.9409   | 0.1  | 0.3  | 6.0  | 32.3   | C10 H13 O Si2 S Br |
|          | 315.9407   | 0.3  | 0.9  | 6.0  | 88.3   | C9 H13 O2 Si3 Br   |
|          | 315.9417   | -0.7 | -2.2 | 7.0  | 2962.1 | C10 H9 O2 Si I     |
|          | 315.9419   | -0.9 | -2.8 | 7.0  | 2953.7 | C11 H9 O S I       |

Figure S6. HRMS data of **9**

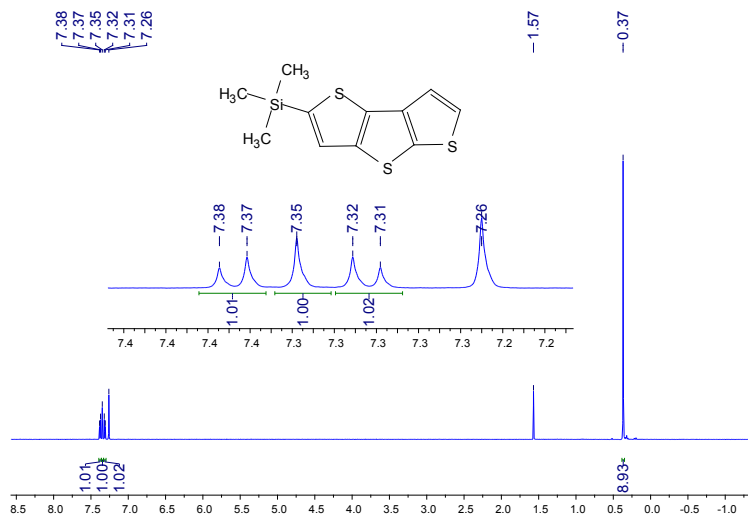

Figure S7.  $^1\text{H}$  NMR (400 MHz,  $\text{CDCl}_3$ ) spectrum of **10**

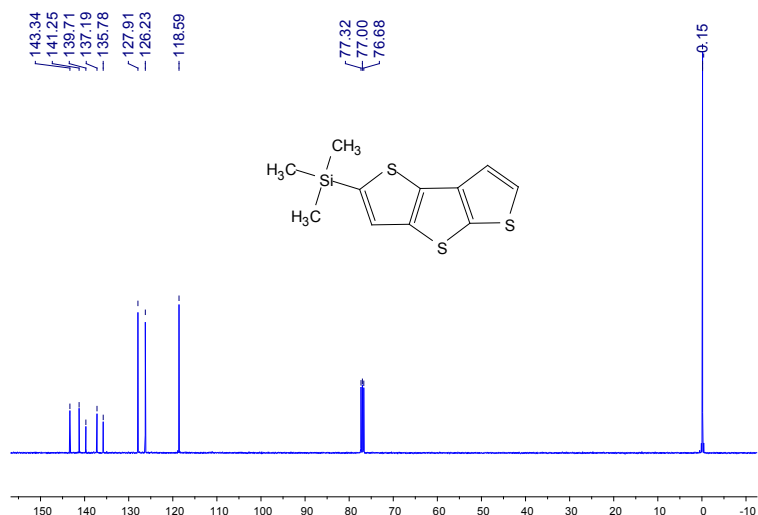

Figure S8. <sup>13</sup>C NMR (100 MHz, CDCl<sub>3</sub>) spectrum of **10**

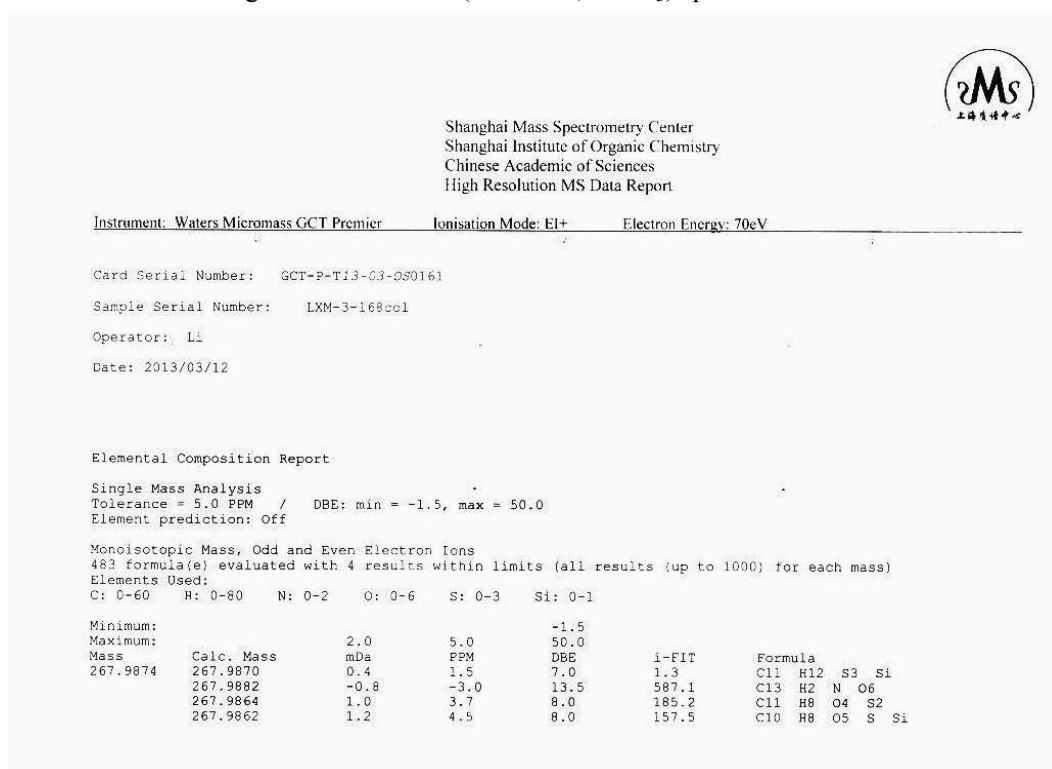

Figure S9. HRMS data of **10**

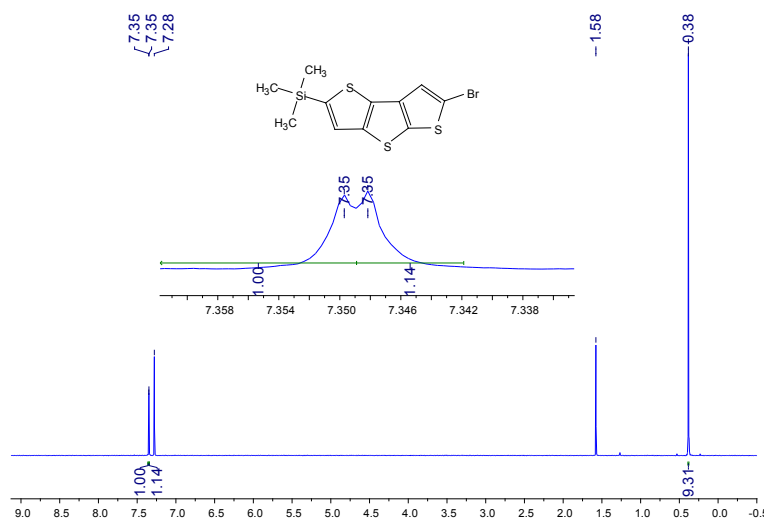

Figure S10. <sup>1</sup>H NMR (400 MHz, CDCl<sub>3</sub>) spectrum of **11**

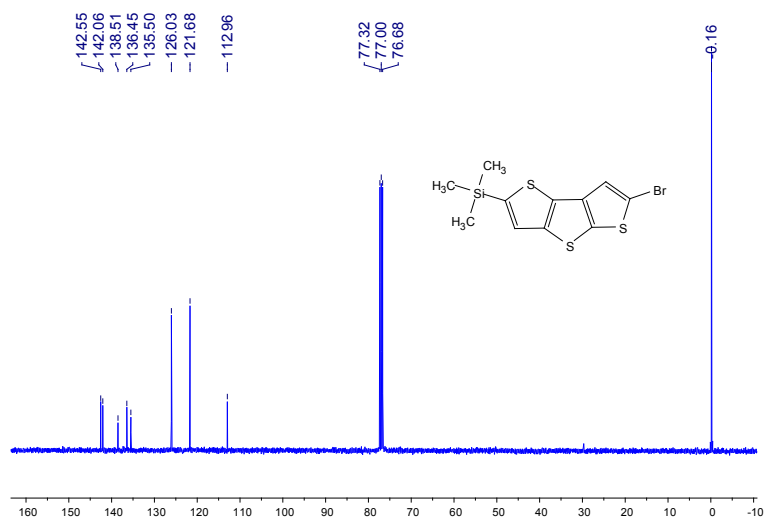

Figure S11. <sup>13</sup>C NMR (100 MHz, CDCl<sub>3</sub>) spectrum of **11**



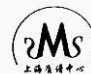

Shanghai Mass Spectrometry Center  
Shanghai Institute of Organic Chemistry  
Chinese Academy of Sciences  
High Resolution MS Data Report

Instrument: Waters Micromass GCT Premier Ionisation Mode: EI+ Electron Energy: 70eV

Card Serial Number: GCT-P-T13-03 GS0162

Sample Serial Number: LXM-3-169001

Operator: Li

Date: 2013/03/12

#### Elemental Composition Report

Single Mass Analysis  
Tolerance = 5.0 PPM / DBE: min = -1.5, max = 50.0  
Element prediction: Off

Monoisotopic Mass, Odd and Even Electron Ions  
840 formula(e) evaluated with 4 results within limits (all results (up to 1000) for each mass)  
Elements Used:

|          |            |        |        |        |         |                  |
|----------|------------|--------|--------|--------|---------|------------------|
| C: 0-60  | H: 0-80    | N: 0-2 | O: 0-4 | S: 0-3 | Br: 0-1 | Si: 0-1          |
| Minimum: |            |        |        |        |         |                  |
| Maximum: |            |        |        |        |         |                  |
| Mass     | Calc. Mass | mDa    | PPM    | DBE    | i-FIT   | Formula          |
| 345.8973 | 345.8976   | -0.3   | -0.9   | 7.0    | 2.8     | C11 H11 S3 Br Si |
|          | 345.8969   | 0.4    | 1.2    | 8.0    | 6.4     | C11 H7 O4 S2 Br  |
|          | 345.8962   | 1.1    | 3.2    | 17.5   | 6.3     | C17 H N O S Br   |
|          | 345.8960   | 1.3    | 3.8    | 17.5   | 7.5     | C16 H N O2 Br Si |

Figure S12. HRMS data of **11**

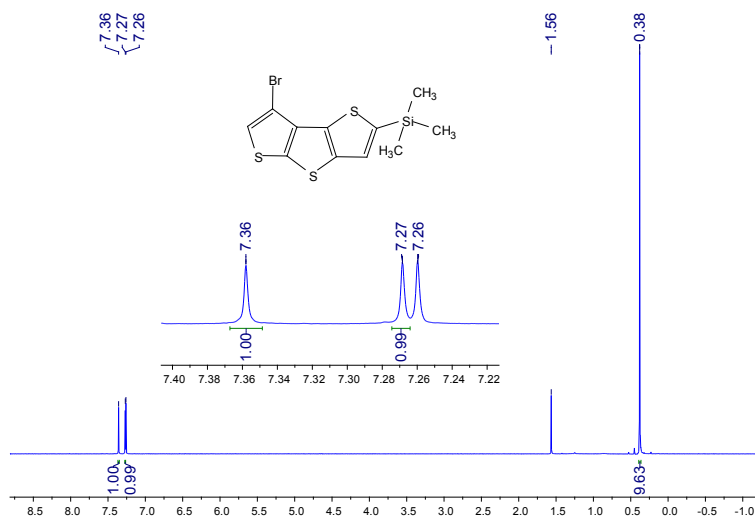

Figure S13. <sup>1</sup>H NMR (400 MHz, CDCl<sub>3</sub>) spectrum of **12**

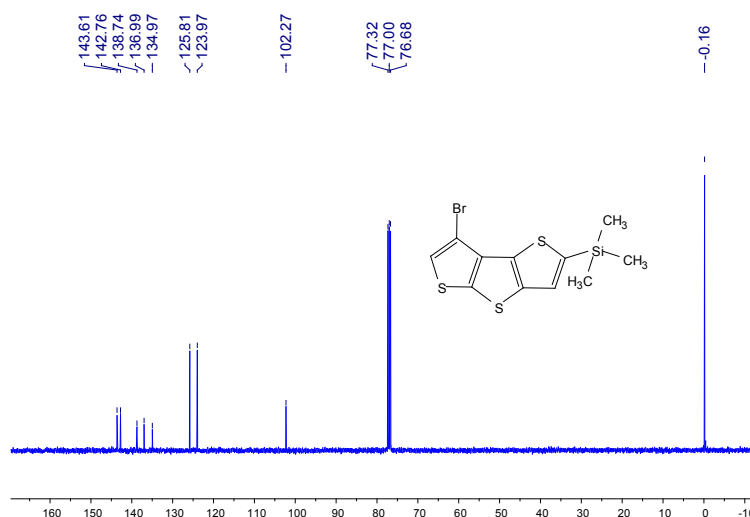

Figure S14.  $^{13}\text{C}$  NMR (100 MHz,  $\text{CDCl}_3$ ) spectrum of **12**

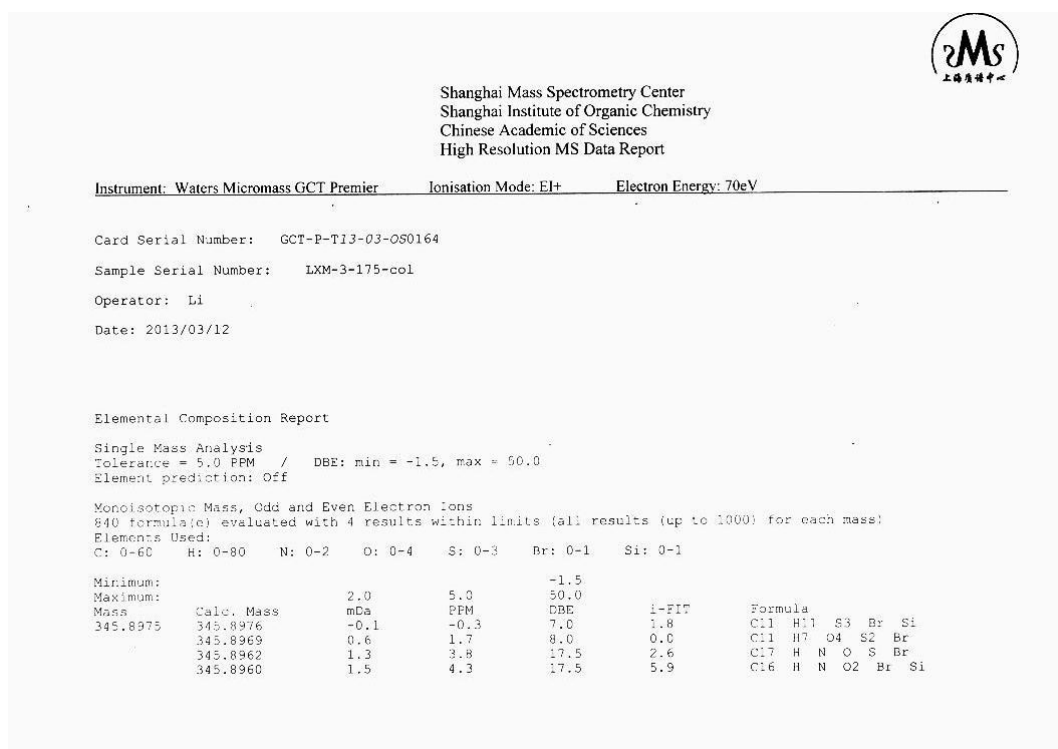

Figure S15. HRMS data of **12**

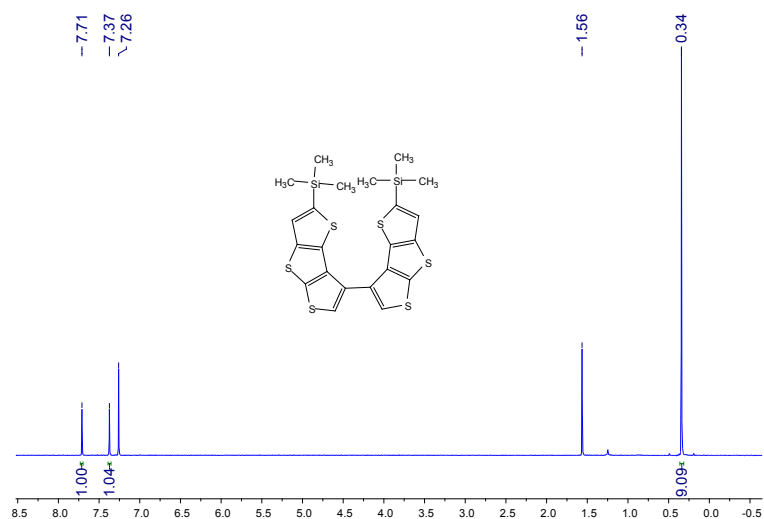

Figure S16. <sup>1</sup>H NMR (400 MHz, CDCl<sub>3</sub>) spectrum of **13**

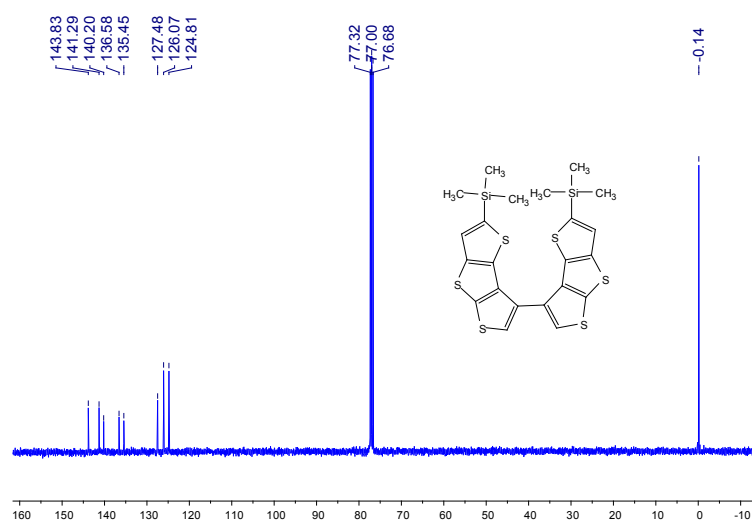

Figure S17. <sup>13</sup>C NMR (100 MHz, CDCl<sub>3</sub>) spectrum of **13**

Instrument: IonSpec 4.7 Tesla FTMS

Card Serial Number : WI13 0562

Sample Serial Number: lxm-3-178-col

Operator : HuaQin Date: 2013/03/07

Operation Mode: MALDI/DHB

### **Elemental Composition Search Report:**

#### **Target Mass:**

Target m/z = 533.9563  $\pm$  0.003

Charge = +1

#### **Possible Elements:**

| Element | Exact Mass | Min | Max |
|---------|------------|-----|-----|
| C       | 12.000000  | 0   | 100 |
| H       | 1.007825   | 0   | 100 |
| Si      | 27.976927  | 0   | 3   |
| S       | 31.972071  | 0   | 7   |

#### **Additional Search Restrictions:**

DBE Limit Mode = Both Integer and Half-Integer

Minimum DBE = 0

#### **Search Results:**

Number of Hits = 3

| m/z       | Delta m/z | DBE  | Formula                                                                       |
|-----------|-----------|------|-------------------------------------------------------------------------------|
| 533.95788 | -0.00158  | 12.0 | C <sub>22</sub> H <sub>22</sub> Si <sub>2</sub> S <sub>6</sub> * <sup>1</sup> |
| 533.95451 | 0.00179   | 17.0 | C <sub>25</sub> H <sub>18</sub> Si <sub>2</sub> S <sub>5</sub> * <sup>1</sup> |
| 533.95924 | -0.00294  | 39.0 | C <sub>39</sub> H <sub>2</sub> S <sub>2</sub> * <sup>1</sup>                  |

Figure S18. HRMS data of **13**

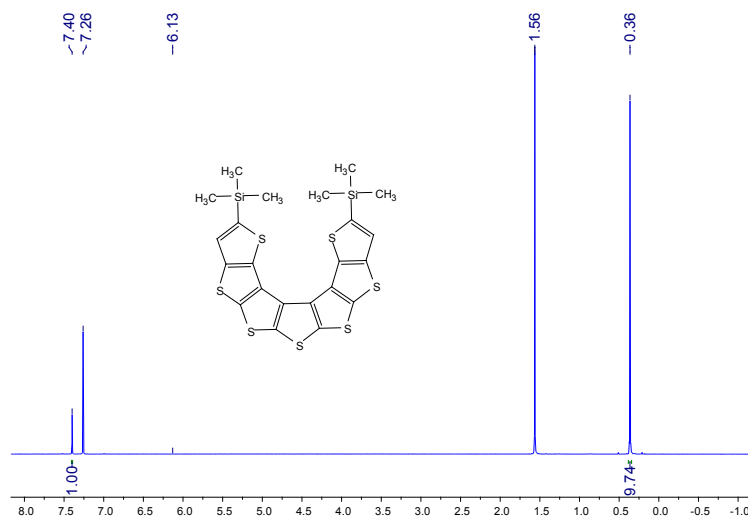

Figure S19. <sup>1</sup>H NMR (400 MHz, CDCl<sub>3</sub>) spectrum of *rac*-1

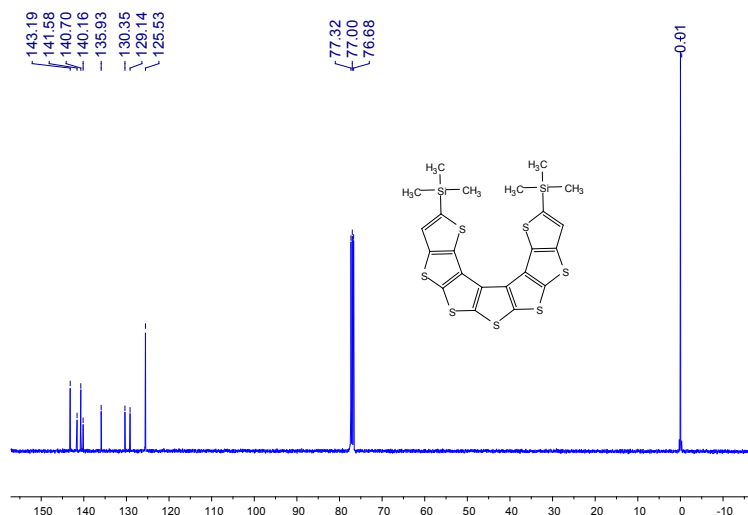

Figure S20.  $^{13}\text{C}$  NMR (100 MHz,  $\text{CDCl}_3$ ) spectrum of *rac*-1

Instrument: IonSpec 4.7 Tesla FTMS

Card Serial Number : W113 0563

Sample Serial Number: lxm-3-181-col

Operator : HuaQin Date: 2013/03/07

Operation Mode: MALDI/DHB

### Elemental Composition Search Report:

#### Target Mass:

Target  $m/z$  =  $563.9131 \pm 0.003$

Charge = +1

#### Possible Elements:

| Element | Exact Mass | Min | Max |
|---------|------------|-----|-----|
| C       | 12.000000  | 0   | 100 |
| H       | 1.007825   | 0   | 100 |
| Si      | 27.976927  | 0   | 3   |
| S       | 31.972071  | 0   | 7   |

#### Additional Search Restrictions:

DBE Limit Mode = Both Integer and Half-Integer

Minimum DBE = 0

#### Search Results:

Number of Hits = 3

| $m/z$     | Delta $m/z$ | DBE  | Formula                                                |
|-----------|-------------|------|--------------------------------------------------------|
| 563.91430 | -0.00120    | 13.0 | $\text{C}_{22}\text{H}_{20}\text{Si}_2\text{S}_7^{+1}$ |
| 563.91093 | 0.00217     | 18.0 | $\text{C}_{25}\text{H}_{16}\text{Si}_2\text{S}_6^{+1}$ |
| 563.91566 | -0.00256    | 40.0 | $\text{C}_{39}\text{S}_3^{+1}$                         |

Figure S21. HRMS data of *rac*-1

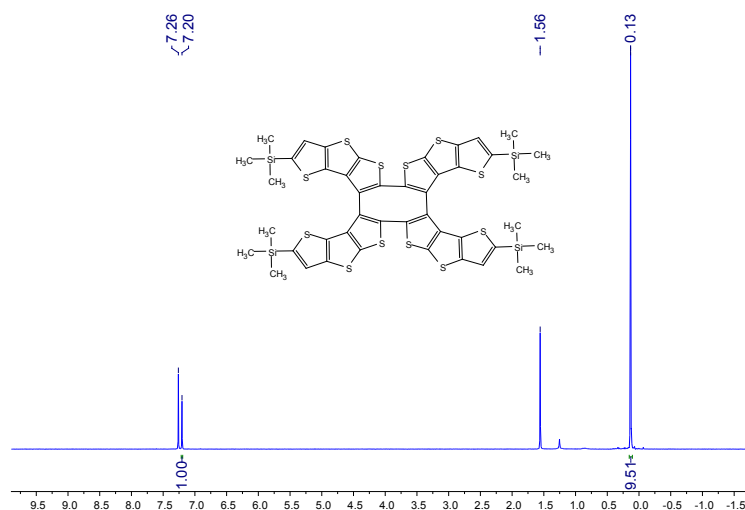

Figure S22.  $^1\text{H}$  NMR (400 MHz,  $\text{CDCl}_3$ ) spectrum of *rac-2*

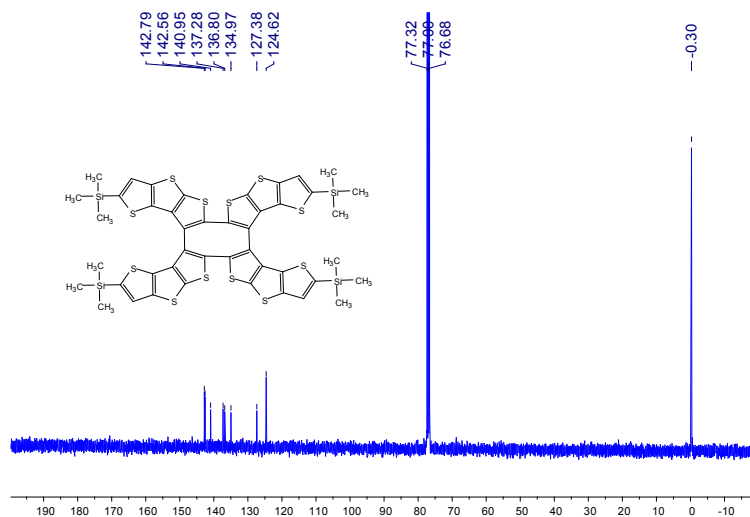

Figure S23.  $^{13}\text{C}$  NMR (100 MHz,  $\text{CDCl}_3$ ) spectrum of *rac-2*

National Center for Organic Mass Spectrometry in Shanghai  
 Shanghai Institute of Organic Chemistry  
 Chinese Academic of Sciences  
 High Resolution MS DATA REPORT



---

Instrument: Thermo Fisher Scientific LTQ FT Ultra

Card Serial Number : M150092

Sample Serial Number: wss-4-cot

Operator : HUAQIN                      Date: 2015/01/08

Operation Mode: MALDI\_DHB

Elemental composition search on mass 1063.89

| m/z = 1058.89-1068.89 |            | Delta<br>(ppm) | RDB<br>equiv. | Composition                                                     |
|-----------------------|------------|----------------|---------------|-----------------------------------------------------------------|
| m/z                   | Theo. Mass |                |               |                                                                 |
| 1063.8882             | 1063.8856  | 2.51           | 29.0          | C <sub>44</sub> H <sub>40</sub> S <sub>12</sub> Si <sub>4</sub> |

Figure S24. HRMS data of *rac-2*

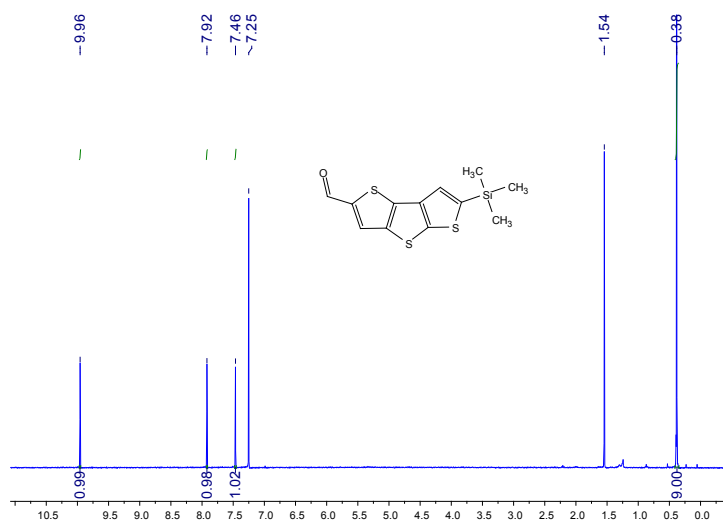

Figure S25.  $^1\text{H}$  NMR (400 MHz,  $\text{CDCl}_3$ ) spectrum of **15**

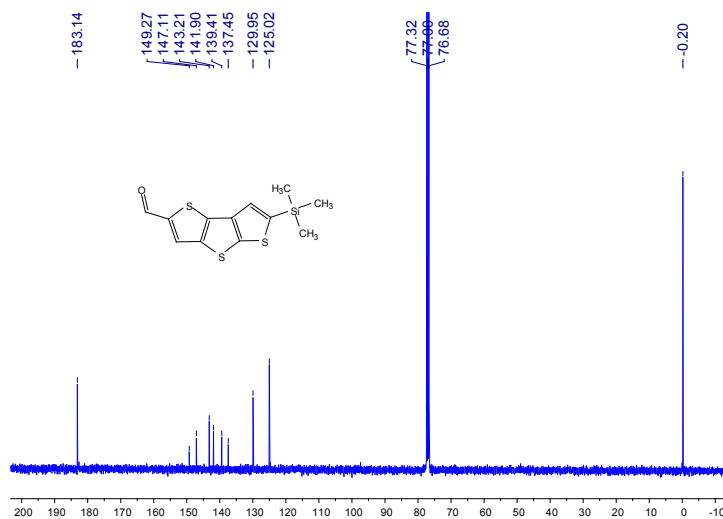

Figure S26.  $^{13}\text{C}$  NMR (100 MHz,  $\text{CDCl}_3$ ) spectrum of **15**

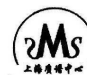

Shanghai Mass Spectrometry Center  
Shanghai Institute of Organic Chemistry  
Chinese Academic of Sciences  
High Resolution MS Data Report

Instrument: Waters Micromass GCT Premier Ionisation Mode: EI+ Electron Energy: 70eV

Card Serial Number: GCT-P-T12-12-OS0908

Sample Serial Number: SHL-4-82

Operator: Li

Date: 2012/12/11

Elemental Composition Report

Single Mass Analysis  
Tolerance = 5.0 PPM / DBE: min = -1.5, max = 50.0  
Element prediction: Off

Monoisotopic Mass, Odd and Even Electron Ions

324 formula(e) evaluated with 2 results within limits (all results (up to 1000) for each mass)

Elements Used:

C: 0-60 H: 0-80 N: 0-1 O: 0-4 S: 0-4 Si: 0-1

| Minimum: | Maximum: | Calc. Mass | mDa | PPM | DBE | i-FIT | Formula         |
|----------|----------|------------|-----|-----|-----|-------|-----------------|
| Mass     | 295.9822 | 295.9822   | 0.0 | 0.0 | 8.0 | 3.9   | C13 H12 S4      |
|          | 295.9820 |            | 0.2 | 0.7 | 8.0 | 0.1   | C12 H12 O S3 Si |

Figure S27. HRMS data of **15**

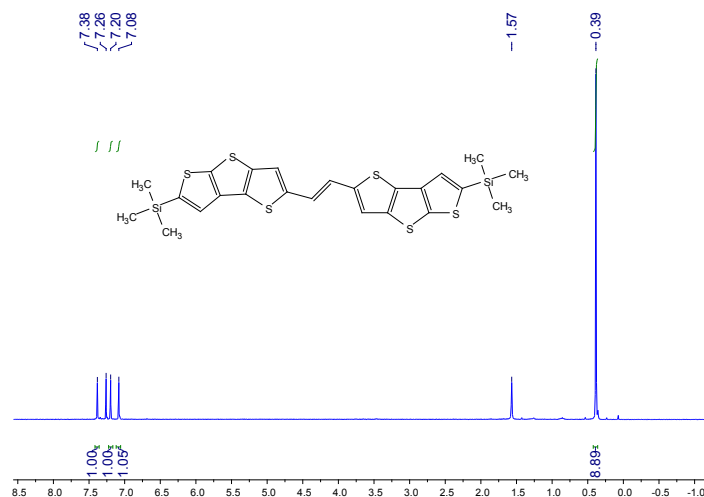

Figure S28. <sup>1</sup>H NMR (400 MHz, CDCl<sub>3</sub>) spectrum of **16**

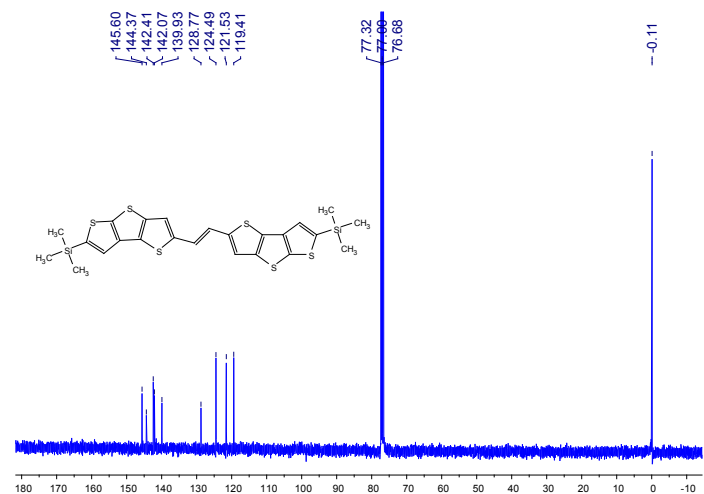

Figure S29. <sup>13</sup>C NMR (100 MHz, CDCl<sub>3</sub>) spectrum of **16**



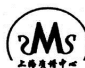

Instrument: IonSpec 4.7 Tesla FTMS

Card Serial Number : WI13 0101

Sample Serial Number: shl-4-87

Operator : HuaQin Date: 2012/12/26

Operation Mode: MALDI/DHB

### Elemental Composition Search Report:

#### Target Mass:

Target m/z = 559.9753  $\pm$  0.003

Charge = +1

#### Possible Elements:

| Element | Exact Mass | Min. | Max. |
|---------|------------|------|------|
| C       | 12.000000  | 0    | 100  |
| H       | 1.007825   | 0    | 100  |
| Si      | 27.976927  | 0    | 5    |
| S       | 31.972071  | 0    | 9    |

#### Additional Search Restrictions:

DBE Limit Mode = Both Integer and Half-Integer

Minimum DBE = 0

#### Search Results:

Number of Hits = 5

| m/z       | Delta m/z | DBE  | Formula                                                                       |
|-----------|-----------|------|-------------------------------------------------------------------------------|
| 559.97489 | 0.00041   | 40.0 | C <sub>41</sub> H <sub>4</sub> S <sub>2</sub> <sup>+</sup> 1                  |
| 559.97690 | -0.00160  | 8.0  | C <sub>21</sub> H <sub>26</sub> Si <sub>2</sub> S <sub>7</sub> <sup>+</sup> 1 |
| 559.97353 | 0.00177   | 13.0 | C <sub>24</sub> H <sub>24</sub> Si <sub>2</sub> S <sub>6</sub> <sup>+</sup> 1 |
| 559.97799 | -0.00269  | 29.0 | C <sub>34</sub> H <sub>12</sub> Si <sub>5</sub> <sup>+</sup> 1                |
| 559.97826 | -0.00296  | 35.0 | C <sub>38</sub> H <sub>6</sub> S <sub>3</sub> <sup>+</sup> 1                  |

Figure S30. HRMS data of **16**

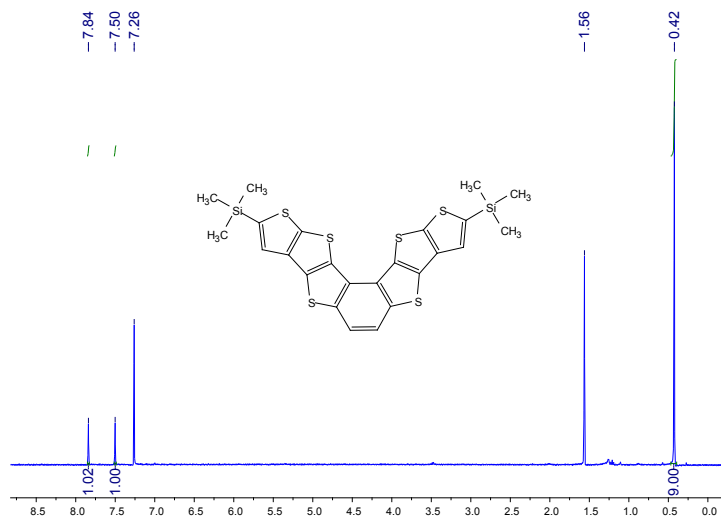

Figure S31. <sup>1</sup>H NMR (400 MHz, CDCl<sub>3</sub>) spectrum of **4**

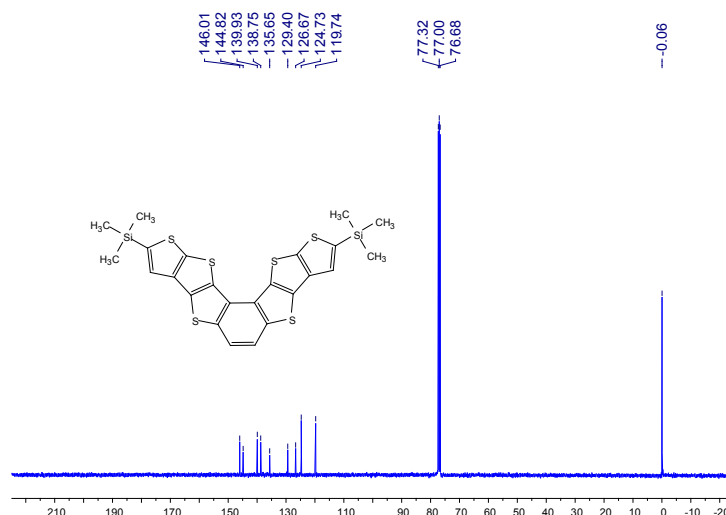

Figure S32. <sup>13</sup>C NMR (100 MHz, CDCl<sub>3</sub>) spectrum of **4**

Shanghai Mass Spectrometry Center  
Shanghai Institute of Organic Chemistry  
Chinese Academic of Sciences  
High Resolution MS DATA REPORT

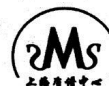

Instrument: IonSpec 4.7 Tesla FTMS

Card Serial Number : WI13 0102

Sample Serial Number: shl-4-93

Operator : HuaQin Date: 2012/12/26

Operation Mode: MALDI/DHB

### Elemental Composition Search Report:

#### Target Mass:

Target m/z = 557.9595 ± 0.003  
Charge = +1

#### Possible Elements:

| Element | Exact Mass | Min | Max |
|---------|------------|-----|-----|
| C       | 12.000000  | 0   | 100 |
| H       | 1.007825   | 0   | 100 |
| Si      | 27.976927  | 0   | 5   |
| S       | 31.972071  | 0   | 9   |

#### Additional Search Restrictions:

DBE Limit Mode = Both Integer and Half-Integer  
Minimum DBE = 0

#### Search Results:

Number of Hits = 4

| m/z       | Delta m/z | DBE  | Formula                                                                      |
|-----------|-----------|------|------------------------------------------------------------------------------|
| 557.95924 | 0.00026   | 41.0 | C <sub>41</sub> H <sub>2</sub> S <sub>2</sub> <sup>+1</sup>                  |
| 557.95788 | 0.00162   | 14.0 | C <sub>24</sub> H <sub>22</sub> Si <sub>2</sub> S <sub>6</sub> <sup>+1</sup> |
| 557.96125 | -0.00175  | 9.0  | C <sub>21</sub> H <sub>26</sub> Si <sub>2</sub> S <sub>7</sub> <sup>+1</sup> |
| 557.96234 | -0.00284  | 30.0 | C <sub>34</sub> H <sub>10</sub> Si <sub>5</sub> <sup>+1</sup>                |

Figure S33. HRMS data of **4**

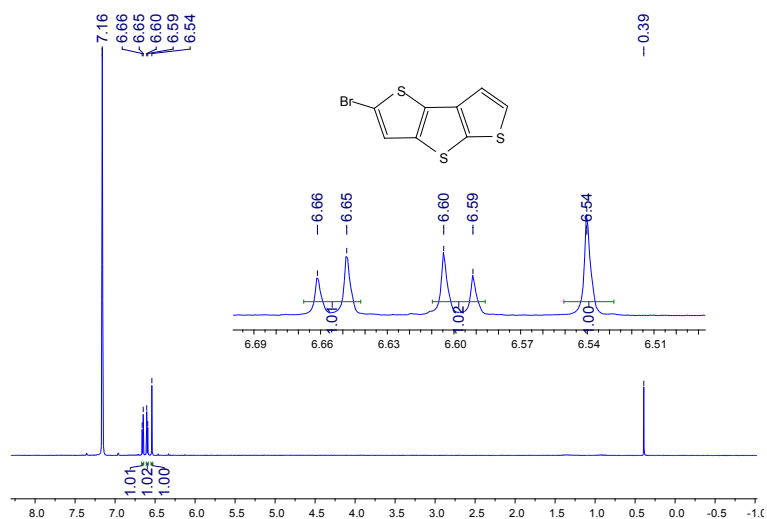

Figure S34. <sup>1</sup>H NMR (400 MHz, benzene-*d*<sub>6</sub>) spectrum of **17**

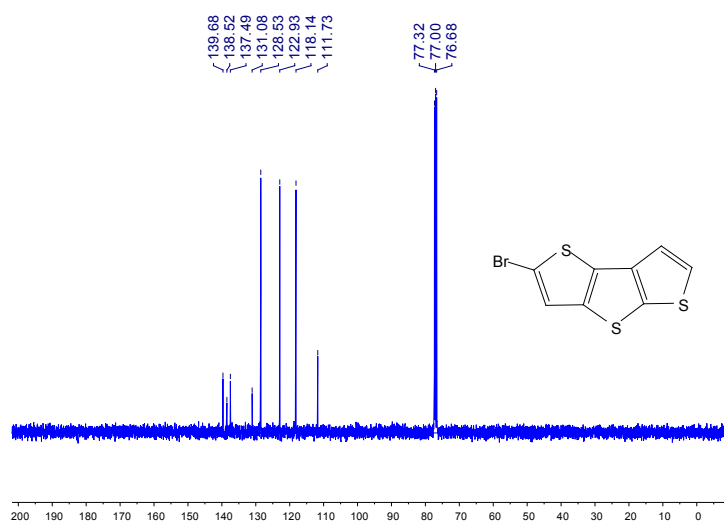

Figure S35. <sup>13</sup>C NMR (100 MHz, CDCl<sub>3</sub>) spectrum of **17**

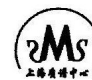

Shanghai Mass Spectrometry Center  
Shanghai Institute of Organic Chemistry  
Chinese Academic of Sciences  
High Resolution MS Data Report

Instrument: Waters Micromass GCT Premier Ionisation Mode: EI+ Electron Energy: 70eV

Card Serial Number: GCT-P-T12-09-050737

Sample Serial Number: SHL-3-176

Operator: Li

Date: 2012/09/19

Elemental Composition Report

Single Mass Analysis  
Tolerance = 5.0 PPM / DBE: min = -1.5, max = 50.0  
Element prediction: Off

Monoisotopic Mass, Odd and Even Electron Ions  
695 formula(e) evaluated with 3 results within limits (all results (up to 1000) for each mass)

Elements Used:

C: 0-60 H: 0-80 N: 0-2 O: 0-4 S: 0-3 Cl: 0-1 Br: 0-2

|          |            |      |      |      |           |                    |  |  |  |
|----------|------------|------|------|------|-----------|--------------------|--|--|--|
| Minimum: |            |      |      |      |           |                    |  |  |  |
| Maximum: |            |      |      |      |           |                    |  |  |  |
| Mass     | Calc. Mass | 2.0  | 5.0  | -1.5 |           |                    |  |  |  |
| 273.8578 |            | mDa  | PEM  | DBE  | i-FIT     | Formula            |  |  |  |
|          | 273.8580   | -0.2 | -0.7 | 7.0  | 2773014.5 | C8 H3 S3 Br        |  |  |  |
|          | 273.8576   | 0.2  | 0.7  | 3.5  | 2773012.8 | C4 H2 N O4 S Cl Br |  |  |  |
|          | 273.8589   | -1.1 | -4.0 | 2.0  | 2773014.3 | C3 H4 N2 O3 Br2    |  |  |  |

Figure S36. HRMS data of **17**

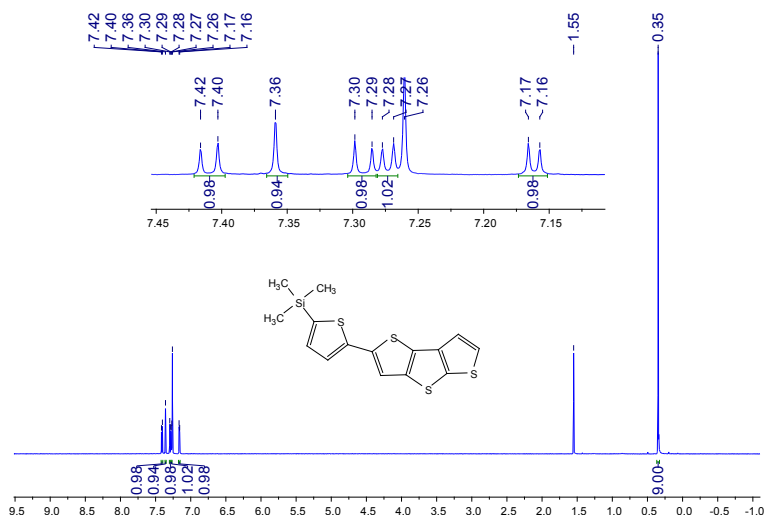

Figure S37. <sup>1</sup>H NMR (400 MHz, CDCl<sub>3</sub>) spectrum of **18**

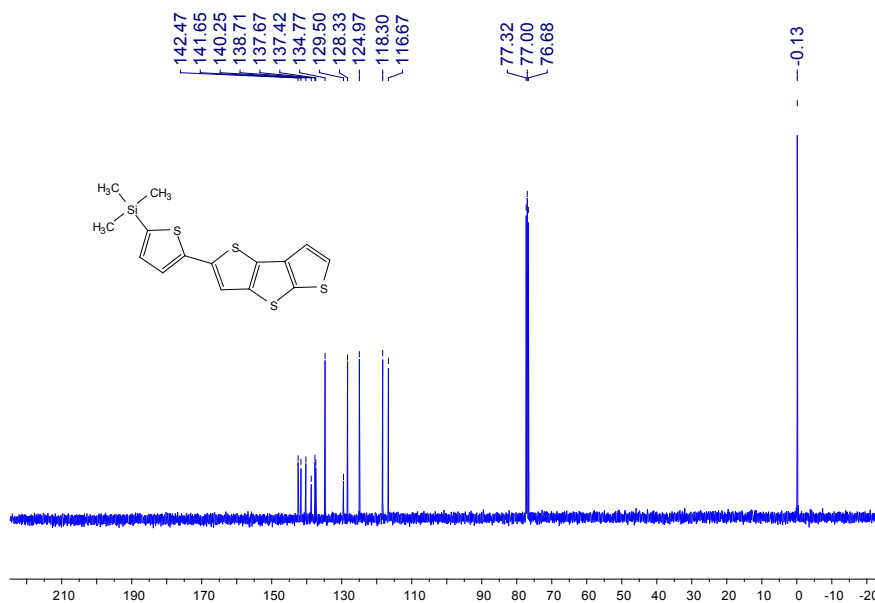

Figure S38.  $^{13}\text{C}$  NMR (100 MHz,  $\text{CDCl}_3$ ) spectrum of **18**

Shanghai Mass Spectrometry Center  
Shanghai Institute of Organic Chemistry  
Chinese Academic of Sciences  
High Resolution MS DATA REPORT

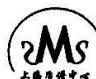

Instrument: IonSpec 4.7 Tesla FTMS

Card Serial Number : I12 1449

Sample Serial Number: shl-3-160

Operator : HuaQin Date: 2012/09/18

Operation Mode: MALDI/DHB

#### Elemental Composition Search Report:

##### **Target Mass:**

Target  $m/z$  = 349.9729  $\pm$  0.002  
Charge = +1

##### **Possible Elements:**

| Element | Exact Mass | Min | Max |
|---------|------------|-----|-----|
| C       | 12.000000  | 0   | 100 |
| H       | 1.007825   | 0   | 100 |
| S       | 31.972071  | 0   | 100 |
| Si      | 27.976927  | 0   | 100 |

##### **Additional Search Restrictions:**

DBE Limit Mode = Both Integer and Half-Integer  
Minimum DBE = 0

##### **Search Results:**

Number of Hits = 2

| $m/z$     | Delta $m/z$ | DBE | Formula                                              |
|-----------|-------------|-----|------------------------------------------------------|
| 349.97393 | -0.00103    | 3.0 | $\text{C}_{11}\text{H}_{18}\text{SSi}_6^{+1}$        |
| 349.97421 | -0.00131    | 9.0 | $\text{C}_{15}\text{H}_{14}\text{S}_4\text{Si}^{+1}$ |

Figure S39. HRMS data of **18**

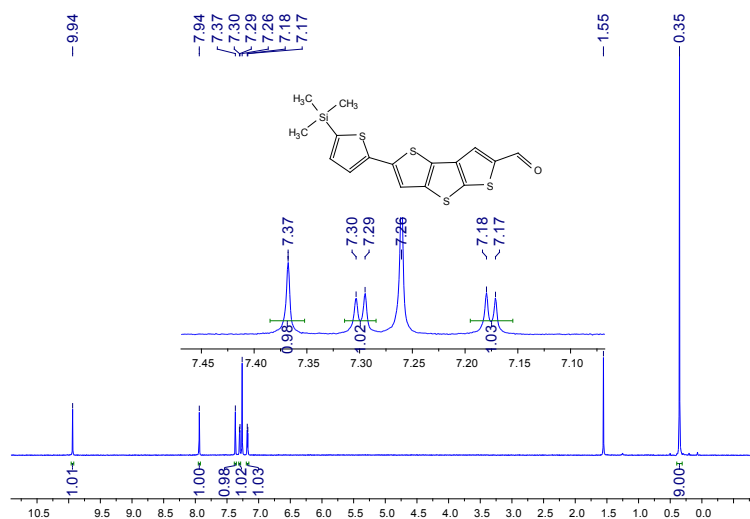

Figure S40. <sup>1</sup>H NMR (400 MHz, CDCl<sub>3</sub>) spectrum of **19**

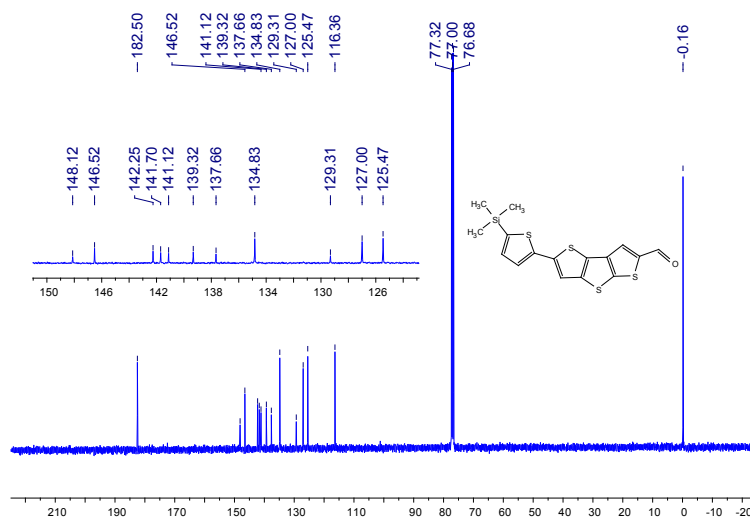

Figure S41. <sup>13</sup>C NMR (100 MHz, CDCl<sub>3</sub>) spectrum of **19**

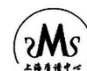

Shanghai Mass Spectrometry Center  
Shanghai Institute of Organic Chemistry  
Chinese Academy of Sciences  
High Resolution MS Data Report

Instrument: Waters Micromass GCT Premier Ionisation Mode: EI+ Electron Energy: 70eV

Card Serial Number: GCT-P-T12-12-OS0906

Sample Serial Number: SHL-4-37

Operator: Li

Date: 2012/12/11

#### Elemental Composition Report

Single Mass Analysis  
Tolerance = 5.0 PPM / DBE: min = -1.5, max = 50.0  
Element prediction: Off

Monoisotopic Mass, Odd and Even Electron Ions  
422 formula(e) evaluated with 4 results within limits (all results (up to 1000) for each mass)

Elements Used:

C: 0-60 H: 0-80 N: 0-1 O: 0-4 S: 0-4 Si: 0-1

|          |            |      |      |      |       |                   |  |  |  |  |
|----------|------------|------|------|------|-------|-------------------|--|--|--|--|
| Minimum: |            |      |      |      |       |                   |  |  |  |  |
| Maximum: |            |      |      |      |       |                   |  |  |  |  |
| Mass     | Calc. Mass | mDa  | PPM  | DBE  | i-FIT | Formula           |  |  |  |  |
| 377.9701 | 377.9697   | 0.4  | 1.1  | 11.0 | 3.9   | C16 H14 O S4 Si   |  |  |  |  |
|          | 377.9715   | -1.4 | -3.7 | 16.5 | 13.0  | C18 H8 N O3 S2 Si |  |  |  |  |
|          | 377.9717   | -1.6 | -4.2 | 16.5 | 7.6   | C19 H8 N O2 S3    |  |  |  |  |
|          | 377.9683   | 1.8  | 4.8  | 21.5 | 21.7  | C22 H4 N O2 S2    |  |  |  |  |

Figure S42. HRMS data of 19

Shanghai Mass Spectrometry Center  
Shanghai Institute of Organic Chemistry  
Chinese Academy of Sciences  
High Resolution MS DATA REPORT

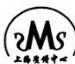

Instrument: IonSpec 4.7 Tesla FTMS

Card Serial Number : WI13 0099

Sample Serial Number: shl-4-40

Operator : HuaQin Date: 2012/12/26

Operation Mode: MALDI/DHB

#### Elemental Composition Search Report:

##### Target Mass:

Target m/z = 723.9497 ± 0.003  
Charge = +1

##### Possible Elements:

| Element | Exact Mass | Min | Max |
|---------|------------|-----|-----|
| C       | 12.000000  | 0   | 100 |
| H       | 1.007825   | 0   | 100 |
| Si      | 27.976927  | 0   | 5   |
| S       | 31.972071  | 0   | 9   |

##### Additional Search Restrictions:

DBE Limit Mode = Both Integer and Half-Integer  
Minimum DBE = 0

##### Search Results:

Number of Hits = 5

| m/z       | Delta m/z | DBE  | Formula                                                                      |
|-----------|-----------|------|------------------------------------------------------------------------------|
| 723.95006 | -0.00036  | 40.0 | C <sub>45</sub> H <sub>12</sub> Si <sub>5</sub> S <sup>+1</sup>              |
| 723.95034 | -0.00064  | 46.0 | C <sub>49</sub> H <sub>8</sub> Si <sub>4</sub> S <sup>+1</sup>               |
| 723.94897 | 0.00073   | 19.0 | C <sub>32</sub> H <sub>28</sub> Si <sub>2</sub> S <sub>8</sub> <sup>+1</sup> |
| 723.95234 | -0.00264  | 14.0 | C <sub>29</sub> H <sub>32</sub> Si <sub>2</sub> S <sub>9</sub> <sup>+1</sup> |
| 723.94696 | 0.00274   | 51.0 | C <sub>52</sub> H <sub>4</sub> S <sub>3</sub> <sup>+1</sup>                  |

Figure S43. HRMS data of 20

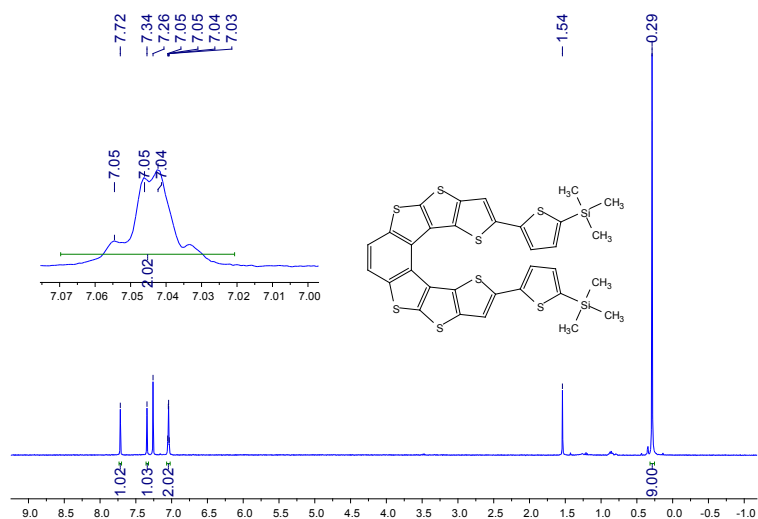

Figure S44. <sup>1</sup>H NMR (400 MHz, CDCl<sub>3</sub>) spectrum of *rac-3*

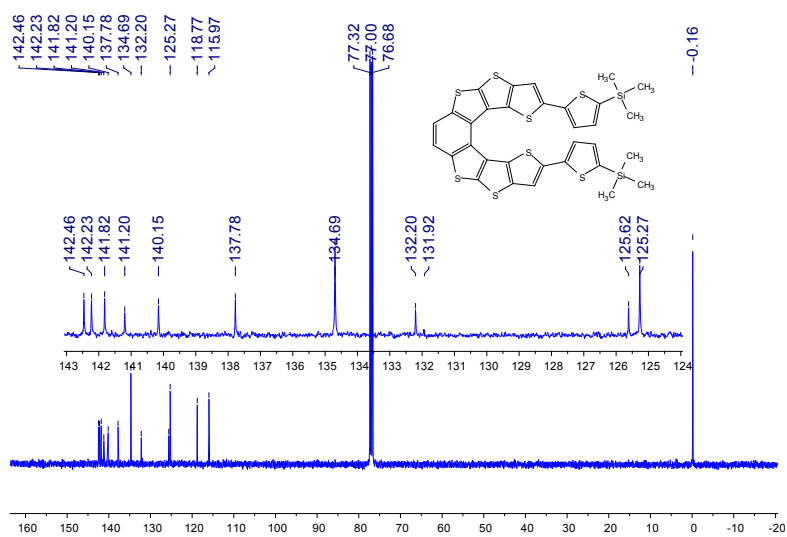

Figure S45. <sup>13</sup>C NMR (100 MHz, CDCl<sub>3</sub>) spectrum of *rac-3*



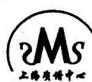

Instrument: IonSpec 4.7 Tesla FTMS

Card Serial Number : WI13 0100

Sample Serial Number: shl-4-60

Operator : HuaQin Date: 2012/12/26

Operation Mode: MALDI/DHB

#### **Elemental Composition Search Report:**

##### **Target Mass:**

Target m/z = 721.9346 ± 0.003  
Charge = +1

##### **Possible Elements:**

| Element | Exact Mass | Min | Max |
|---------|------------|-----|-----|
| C       | 12.000000  | 0   | 100 |
| H       | 1.007825   | 0   | 100 |
| Si      | 27.976927  | 0   | 5   |
| S       | 31.972071  | 0   | 9   |

##### **Additional Search Restrictions:**

DBE Limit Mode = Both Integer and Half-Integer  
Minimum DBE = 0

##### **Search Results:**

Number of Hits = 4

| m/z       | Delta m/z | DBE  | Formula                                                                     |
|-----------|-----------|------|-----------------------------------------------------------------------------|
| 721.93469 | -0.00009  | 47.0 | C <sub>49</sub> H <sub>6</sub> S <sub>4</sub> <sup>+</sup>                  |
| 721.93441 | 0.00019   | 41.0 | C <sub>45</sub> H <sub>10</sub> Si <sub>5</sub> S <sup>+</sup>              |
| 721.93332 | 0.00128   | 20.0 | C <sub>32</sub> H <sub>26</sub> Si <sub>2</sub> S <sub>9</sub> <sup>+</sup> |
| 721.93669 | -0.00209  | 15.0 | C <sub>29</sub> H <sub>30</sub> Si <sub>2</sub> S <sub>9</sub> <sup>+</sup> |

Figure S46. HRMS data of *rac*-3

## 4. X-ray crystallographic Data

### X-ray crystallographic Data of **11**

Table 1. Crystal data and structure refinement for **11**

|                             |                                                     |
|-----------------------------|-----------------------------------------------------|
| Identification code         | <b>11</b>                                           |
| Empirical formula           | C <sub>11</sub> H <sub>11</sub> BrS <sub>3</sub> Si |
| Formula weight              | 347.38                                              |
| Temperature                 | 296(2) K                                            |
| Wavelength                  | 0.71073 Å                                           |
| Crystal system, space group | Monoclinic, P2(1)/c                                 |
|                             | a = 11.5286(10) Å α = 90 °.                         |
| Unit cell dimensions        | b = 15.8164(13) Å β = 110.1900(10) °.               |

|                                        |                                                                    |
|----------------------------------------|--------------------------------------------------------------------|
|                                        | $c = 8.4588(7) \text{ \AA} \quad \gamma = 90^\circ$ .              |
| Volume                                 | $1447.6(2) \text{ \AA}^3$                                          |
| Z, Calculated density                  | 4, $1.594 \text{ Mg/m}^3$                                          |
| Absorption coefficient                 | $3.327 \text{ mm}^{-1}$                                            |
| F(000)                                 | 696                                                                |
| Crystal size                           | $0.46 \times 0.23 \times 0.19 \text{ mm}^3$                        |
| Theta range for data collection        | $1.88$ to $26.00^\circ$                                            |
| Limiting indices                       | $-14 \leq h \leq 14$ , $-19 \leq k \leq 12$ , $-10 \leq l \leq 10$ |
| Reflections collected / unique         | 7997 / 2843 [R(int) = 0.0241]                                      |
| Completeness to $\theta = 24.99^\circ$ | 99.8 %                                                             |
| Absorption correction                  | Semi-empirical from equivalents                                    |
| Max. and min. transmission             | 0.5706 and 0.3098                                                  |
| Refinement method                      | Full-matrix least-squares on $F^2$                                 |
| Data / restraints / parameters         | 2843 / 0 / 145                                                     |
| Goodness-of-fit on $F^2$               | 1.024                                                              |
| Final R indices [I > 2 $\sigma$ (I)]   | R1 = 0.0296, wR2 = 0.0691                                          |
| R indices (all data)                   | R1 = 0.0442, wR2 = 0.0751                                          |
| Largest diff. peak and hole            | 0.266 and -0.345 e. $\text{\AA}^{-3}$                              |

## X-ray crystallographic Data of *rac-1*

Table 2. Crystal data and structure refinement for *rac-1*

|                                        |                                                                                                                                                                          |
|----------------------------------------|--------------------------------------------------------------------------------------------------------------------------------------------------------------------------|
| Identification code                    | <i>rac-1</i>                                                                                                                                                             |
| Empirical formula                      | $\text{C}_{22}\text{H}_{20}\text{S}_7\text{Si}_2$                                                                                                                        |
| Formula weight                         | 564.98                                                                                                                                                                   |
| Temperature                            | 296(2) K                                                                                                                                                                 |
| Wavelength                             | $0.71073 \text{ \AA}$                                                                                                                                                    |
| Crystal system, space group            | Monoclinic, $P2(1)/c$                                                                                                                                                    |
| Unit cell dimensions                   | $a = 19.710(4) \text{ \AA} \quad \alpha = 90^\circ$<br>$b = 13.215(3) \text{ \AA} \quad \beta = 103.753(3)^\circ$<br>$c = 10.489(2) \text{ \AA} \quad \gamma = 90^\circ$ |
| Volume                                 | $2653.9(9) \text{ \AA}^3$                                                                                                                                                |
| Z, Calculated density                  | 4, $1.414 \text{ Mg/m}^3$                                                                                                                                                |
| Absorption coefficient                 | $0.695 \text{ mm}^{-1}$                                                                                                                                                  |
| F(000)                                 | 1168                                                                                                                                                                     |
| Crystal size                           | $0.39 \times 0.32 \times 0.27 \text{ mm}^3$                                                                                                                              |
| Theta range for data collection        | $1.87$ to $26.00^\circ$                                                                                                                                                  |
| Limiting indices                       | $-24 \leq h \leq 24$ , $-16 \leq k \leq 14$ , $-12 \leq l \leq 11$                                                                                                       |
| Reflections collected / unique         | 14534 / 5193 [R(int) = 0.0230]                                                                                                                                           |
| Completeness to $\theta = 24.99^\circ$ | 99.6 %                                                                                                                                                                   |
| Absorption correction                  | Semi-empirical from equivalents                                                                                                                                          |
| Max. and min. transmission             | 0.8346 and 0.7733                                                                                                                                                        |
| Refinement method                      | Full-matrix least-squares on $F^2$                                                                                                                                       |
| Data / restraints / parameters         | 5193 / 21 / 280                                                                                                                                                          |
| Goodness-of-fit on $F^2$               | 1.087                                                                                                                                                                    |
| Final R indices [I > 2 $\sigma$ (I)]   | R1 = 0.0356, wR2 = 0.0985                                                                                                                                                |

|                             |                                                  |
|-----------------------------|--------------------------------------------------|
| R indices (all data)        | R1 = 0.0446, wR2 = 0.1037                        |
| Largest diff. peak and hole | 0.411 and -0.554 e <sup>-</sup> ·Å <sup>-3</sup> |

## X-ray crystallographic Data of **14**

Table 3. Crystal data and structure refinement for **14**

|                                 |                                                                                       |
|---------------------------------|---------------------------------------------------------------------------------------|
| Identification code             | <b>14</b>                                                                             |
| Empirical formula               | C <sub>11</sub> H <sub>11</sub> BrS <sub>3</sub> Si                                   |
| Formula weight                  | 347.38                                                                                |
| Temperature                     | 296(2) K                                                                              |
| Wavelength                      | 0.71073 Å                                                                             |
| Crystal system, space group     | Orthorhombic, Pnma                                                                    |
| Unit cell dimensions            | a = 12.594(5) Å   α = 90 °<br>b = 7.353(3) Å   β = 90 °<br>c = 15.175(6) Å   γ = 90 ° |
| Volume                          | 1405.2(9) Å <sup>3</sup>                                                              |
| Z, Calculated density           | 4, 1.642 Mg/m <sup>3</sup>                                                            |
| Absorption coefficient          | 3.427 mm <sup>-1</sup>                                                                |
| F(000)                          | 696                                                                                   |
| Crystal size                    | 0.19 x 0.15 x 0.13 mm                                                                 |
| Theta range for data collection | 2.10 to 25.00 °                                                                       |
| Limiting indices                | -14 ≤ h ≤ 14, -8 ≤ k ≤ 8, -14 ≤ l ≤ 18                                                |
| Reflections collected / unique  | 6936 / 1335 [R(int) = 0.0366]                                                         |
| Completeness to theta = 25.00   | 99.9 %                                                                                |
| Absorption correction           | Semi-empirical from equivalents                                                       |

|                                   |                                             |
|-----------------------------------|---------------------------------------------|
| Max. and min. transmission        | 0.6643 and 0.5621                           |
| Refinement method                 | Full-matrix least-squares on F <sup>2</sup> |
| Data / restraints / parameters    | 1335 / 2 / 95                               |
| Goodness-of-fit on F <sup>2</sup> | 1.018                                       |
| Final R indices [I>2sigma(I)]     | R1 = 0.0314, wR2 = 0.0795                   |
| R indices (all data)              | R1 = 0.0414, wR2 = 0.0832                   |
| Extinction coefficient            | 0.0055(7)                                   |
| Largest diff. peak and hole       | 0.384 and -0.384 e. Å <sup>-3</sup>         |

### X-ray crystallographic Data of 4

Table 4. Crystal data and structure refinement for 4

|                                 |                                                                                               |
|---------------------------------|-----------------------------------------------------------------------------------------------|
| Identification code             | 4                                                                                             |
| Empirical formula               | C <sub>24</sub> H <sub>22</sub> S <sub>6</sub> Si <sub>2</sub>                                |
| Formula weight                  | 558.96                                                                                        |
| Temperature                     | 296(2) K                                                                                      |
| Wavelength                      | 0.71073 Å                                                                                     |
| Crystal system, space group     | Monoclinic, C2/c                                                                              |
| Unit cell dimensions            | a = 31.277(9) Å   α = 90 °<br>b = 16.691(5) Å   β = 93.503(6) °<br>c = 10.668(3) Å   γ = 90 ° |
| Volume                          | 5559(3) Å <sup>3</sup>                                                                        |
| Z, Calculated density           | 8, 1.336 Mg/m <sup>3</sup>                                                                    |
| Absorption coefficient          | 0.590 mm <sup>-1</sup>                                                                        |
| F(000)                          | 2320                                                                                          |
| Crystal size                    | 0.43 x 0.26 x 0.17 mm                                                                         |
| Theta range for data collection | 1.38 to 25.00 °                                                                               |
| Limiting indices                | -29 ≤ h ≤ 37, -19 ≤ k ≤ 19, -12 ≤ l ≤ 12                                                      |
| Reflections collected / unique  | 13684 / 4896 [R(int) = 0.0661]                                                                |
| Completeness to theta = 25.00   | 100.0 %                                                                                       |
| Absorption correction           | Semi-empirical from equivalents                                                               |
| Max. and min. transmission      | 0.9063 and 0.7854                                                                             |

|                                      |                                       |
|--------------------------------------|---------------------------------------|
| Refinement method                    | Full-matrix least-squares on $F^2$    |
| Data / restraints / parameters       | 4896 / 0 / 290                        |
| Goodness-of-fit on $F^2$             | 1.046                                 |
| Final R indices [ $I > 2\sigma(I)$ ] | $R1 = 0.0642$ , $wR2 = 0.1494$        |
| R indices (all data)                 | $R1 = 0.1099$ , $wR2 = 0.1644$        |
| Extinction coefficient               | 0.00077(17)                           |
| Largest diff. peak and hole          | 0.656 and -0.523 e. $\text{\AA}^{-3}$ |

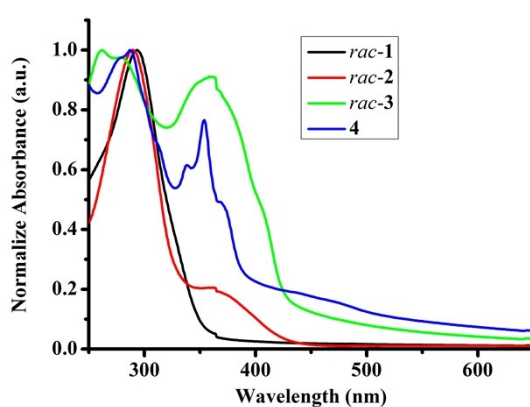

Figure S47. UV-vis absorption spectra of *rac-1*, *rac-2*, *rac-3* and **4** in thin films on quartz substrates.

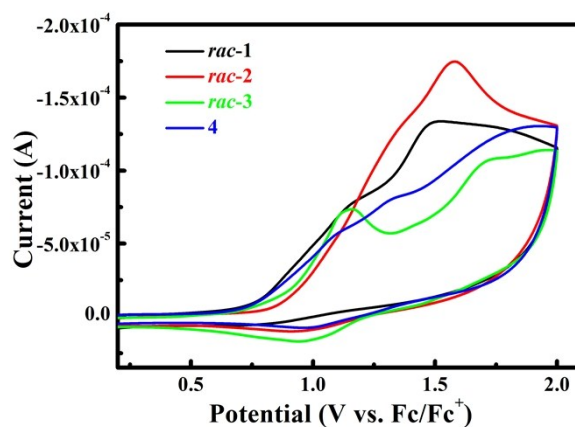

Figure S48. Cyclic voltammograms (left) of *rac-1*, *rac-2*, *rac-3* and **4** films in 0.1 M  $\text{Bu}_4\text{NPF}_6\text{-CH}_3\text{CN}$  solutions at a scanning rate of 100 mV/s.
